# Supplementary material
Source: PubMed Central journal article supplement (PMC2675568)
Supplement: supp_179_9_835__1.pdf [file supp_179_9_835__1.pdf]

**Genetic risk factors for portopulmonary hypertension in patients with  
advanced liver disease**

**Online Data Supplement**

**Authors:**

Kari E. Roberts, Michael B. Fallon, Michael J. Krowka, Robert S. Brown, James F. Trotter, Inga  
Peter, Hocine Tighiouart, James A. Knowles, Daniel Rabinowitz, Raymond L. Benza, David B.  
Badesch, Darren B. Taichman, Evelyn M. Horn, Steven Zacks, Neil Kaplowitz, and  
Steven M. Kawut

for the Pulmonary Vascular Complications of Liver Disease Study Group

## **Methods**

### **Study cohort and study sample**

The Pulmonary Vascular Complications of Liver Disease (PVCLD) Study enrolled a cohort of 536 patients evaluated for liver transplantation or pulmonary hypertension at seven centers in the United States between 2003 and 2006. The only inclusion criterion was the presence of chronic portal hypertension with or without intrinsic liver disease. We excluded patients with evidence of active infection, recent (< two weeks) gastrointestinal bleeding, or who had undergone liver or lung transplantation. Patients in the cohort were referred for evaluation for liver transplantation or pulmonary hypertension. The institutional review boards at each of the participating centers approved this study, and informed consent was obtained.

We performed a case-control study. The study sample included newly-referred patients who were evaluated with transthoracic echocardiography (routinely performed for pre-transplant evaluation) during the study period. “Prevalent” patients who met the case definition (see below) were also included. We excluded patients with pulmonary function testing showing a significant obstructive ventilatory defect, defined as forced expiratory volume in one second (FEV1)/forced vital capacity (FVC) < 0.70 with FEV1 % predicted < 80% or a significant restrictive ventilatory defect, defined as FVC % predicted and (if performed) total lung capacity % predicted < 70% using standard reference equations (1, 2).

Patients who otherwise fulfilled the case definition (see below) without pulmonary function testing were included if chest radiograph did not show hyperinflation or interstitial lung disease; controls without pulmonary function testing were excluded. We also excluded patients with HIV infection or the presence of more than moderate aortic or mitral valvular disease or significant left ventricular dysfunction by transthoracic echocardiography.

### **Case and control definitions**

Cases with PPHTN met the following criteria at initial evaluation: 1) mean pulmonary artery pressure > 25 mm Hg, pulmonary capillary wedge pressure (or left ventricular end-diastolic pressure)  $\leq$  15 mm Hg, and pulmonary vascular resistance > 240 dynes $\cdot$ s<sup>-1</sup> $\cdot$ cm<sup>-5</sup> measured by right heart catheterization, and 2) no other etiology for pulmonary hypertension.

Controls met the following echocardiographic criteria at entry into the cohort: 1) right ventricular (RV) systolic pressure < 40 mm Hg (if estimable) and 2) absence of right atrial or ventricular dilation, hypertrophy, or dysfunction. “Prevalent” cases who had previously undergone evaluation and were subsequently being treated were also included; data from the initial evaluation (before treatment) were used for these cases. During the recruitment period, a screening transthoracic echocardiogram showing RV systolic pressure > 50 mm Hg with abnormal RV morphology was considered an indication for right heart catheterization.

### **Clinical variables and blood sampling**

Data were collected from the patients and from the medical record. The etiology of underlying liver disease (or portal vein thrombosis) and past medical history was recorded. Patients underwent laboratory assessment. The Model for End-stage Liver Disease (MELD) score was calculated (3).

Phlebotomy was performed and blood was collected into EDTA-containing tubes. Samples were centrifuged immediately at 2500 X g for 15 minutes at room temperature. Plasma and buffy coat layers were stored at -80° C.

## **Candidate genes and single nucleotide polymorphism (SNP) selection**

Ninety-three genes affecting vascular function were selected by the investigators (**Table 1**). We selected genes linked to vascular tone and cellular growth regulation, as well as genes coding for key mediators of inflammatory and coagulation cascades. We prioritized those genes previously implicated in human or animal models of pulmonary vascular disease. We also included genes with prior associations with systemic blood pressure regulation and cardiovascular disease. Candidate genes were assigned to functional categories based upon Gene Ontology (GO) Pathways (4). For this study, each candidate gene was defined as a genomic region containing introns, exons, and proximal and distal regulatory regions (coding region  $\pm \sim 5$  kilobases).

Within each candidate region, haplotype block structure was defined using data from the HapMap data release #20/phase 2 Jan 06 (NCBI B35 assembly). SNPs with a minor allele frequency of  $\geq 0.05$  were selected using the following criteria: 1) minimum of one haplotype tagging SNP per block (Haploview 4.0,  $r^2 > 0.8$ ), 2) nonsynonymous substitution, or 3) a prior published association with cardiovascular phenotype.

For this study, 1079 SNPs in the 93 candidate genes were genotyped. These SNPs were distributed as follows: 79 coding (51 nonsynonymous), 749 intronic, and 251 in untranslated regions (**Table E1**).

## **Detection of population substructure and stratification**

We genotyped an additional set of 60 SNPs (null loci) in order to detect potential population substructure and stratification. Null loci were selected from a validated list of Ancestry Informative Markers (5) using the following criteria: 1) minor allele frequency  $\geq 0.10$ ,

2) minimum of 20 Mb between loci, and 3) no linkage ( $r^2 < 0.2$ ) between null and candidate loci. The physical and genetic map positions of the null loci are available from the authors by request.

### **Genotyping**

Genomic DNA was isolated from peripheral leukocytes using standard procedures (Gentra Puregene®, Qiagen, Valencia, CA). SNP genotyping was performed using the GoldenGate® Assay (Illumina, Inc., San Diego, CA).

### **Quality control data**

Three SNPs (0.3%) were unable to be genotyped in  $\geq 15\%$  of subjects. These 3 SNPs were not included in the analysis. Seven replicate DNA samples showed 100% reproducibility of genotypes.

### **Plasma estradiol**

To validate the findings from the genetic analyses, we measured plasma estradiol using a double antibody radioimmunoassay (Diagnostic Products Corp., Los Angeles, CA). The coefficient of variation of this assay was  $< 5\%$  and the sensitivity was 1.4 pg/mL.

### **Statistical analysis**

Continuous data were summarized using mean  $\pm$  standard deviation or median [interquartile range], as appropriate. Categorical variables were summarized using n (%). Unpaired Student's t-tests and Wilcoxon rank sum tests were used to compare continuous

variables between cases and controls, and Chi-square tests and Fisher's exact tests were used for categorical variables.

Hardy-Weinberg equilibrium (HWE) was assessed for genetic alleles using exact tests in controls. The association of genotype with case/control status was assessed using additive models in multivariate logistic regression and expressed with odds ratios (ORs). We adjusted for gender and autoimmune liver disease (previously associated with case status (6)) in the final multivariate logistic regression models. Other liver disease etiologies were assessed as confounders; change in the coefficient for genotype > 20% after inclusion in the regression models was considered to indicate confounding. As the main goal of this study was hypothesis generation, adjustment for multiple comparisons was not performed. Single locus association analyses were performed using SAS/STAT (SAS Institute, Cary, NC).

For genes in which more than one SNP was associated with PPHTN, we determined haplotype structure and pairwise linkage disequilibrium in controls between SNPs using Haploview 4.0 (7). Values of  $D'$  and  $r^2$  approach 1 as the likelihood of recombination between two loci decreases to zero, reflecting increased linkage.

The presence or absence of population stratification was assessed by comparing allele frequencies of the 60 null loci between cases and controls using Chi-square tests with a significance threshold of  $p < 0.05$  (8). Sensitivity analyses assessed the potential impact of racial differences or cryptic subpopulations. Using estimated allele frequencies at the 60 null marker loci, two genetic ancestry clusters were predicted by *STRUCTURE* 2.2 (9). Analyses were then performed including 1) self-identified whites only and 2) subjects with Caucasian genetic ancestry as predicted by *STRUCTURE* 2.2.  $P < 0.05$  was considered significant for all analyses.

There was 80% power to detect odds ratios of  $\geq 2.4 - 4.0$  (or  $\leq 0.25 - 0.42$ ), depending upon the minor allele frequency of the SNP (ranged 0.45 – 0.05). Power analysis was performed using *QUANTO 1.2*. (10).

### **Association testing for loci on the X chromosome**

The genes coding for NADPH oxidase 1 (NOX1), cytochrome b-245 (CYBB), and thromboplastin (HEMB) are located on the X chromosome. For the SNPs in these genes, we employed the methods described by Zheng et al. (11) which include the following:

1. Tests for HWE using Fisher's exact tests in female controls.
2. Allele-based Chi-square tests for males
3. Genotype-based tests of trend using additive genetic models for females.

For all tests,  $p < 0.05$  was considered significant.

## Legend

**Figures E1 through E3.** Linkage disequilibrium (LD) structure of estrogen receptor 1 (ESR1), aromatase (CYP19A1), and angiopoietin 1 (ANGPT1) in controls (Figures E1 – E3, respectively). The strength of LD is depicted graphically for each pair-wise comparison (squares), such that white and blue represent low levels of LD and red indicates high levels of LD (see color key). The SNPs are identified by their RS numbers and displayed relative to the candidate gene region. The display range of the chromosome (black line) corresponds to the genomic region of the candidate gene (roughly coding sequence  $\pm$  5-10 kilobases) targeted by this study. Exon/intron structure of the genes is indicated by thick/thin purple lines according to genome assembly hg17/May 2004. Annotated graphical images were generated using LocusView 2.0 (12).



**Table E1. Genotyped single nucleotide polymorphisms (N = 1079).**

SNPs are organized by chromosome (Chr) and candidate gene. NCBI Reference Sequence (RefSeq) is indicated, as is the minor allele frequency (MAF). The Location of the SNP describes the location of the SNP relative to gene exonic structure: coding, intronic, untranslated region (UTR). SNPs located in portions of the UTR immediately proximal to exons are indicated by the additional term ‘flanking.’

| Chr      | Gene                                             | RefSeq        | SNP        | MAF  | Location      | Amino Acid |
|----------|--------------------------------------------------|---------------|------------|------|---------------|------------|
| 1        | 5,10-methylenetetrahydrofolate reductase (MTHFR) | NM_005957.2   | rs2274976  | 0.06 | coding        | R593Q      |
|          |                                                  |               | rs1801131  | 0.36 | coding        | E428A      |
|          |                                                  |               | rs1801133  | 0.24 | coding        | A221V      |
|          |                                                  |               | rs7533315  | 0.31 | intron        |            |
|          |                                                  |               | rs9651118  | 0.26 | intron        |            |
|          |                                                  |               | rs7525338  | 0.01 | intron        |            |
|          |                                                  |               | rs3737964  | 0.31 | intron        |            |
| 1        | Natriuretic peptide precursor A (NPPA)           | NM_006172.1   | rs198414   | 0.14 | 3UTR          |            |
|          | Natriuretic peptide precursor B (NPPB)           | NM_002521.1   | rs198358   | 0.27 | flanking_3UTR |            |
|          |                                                  |               | rs198359   | 0.11 | flanking_3UTR |            |
|          |                                                  |               | rs12024265 | na   | flanking_3UTR |            |
|          |                                                  |               | rs198361   | 0.15 | flanking_3UTR |            |
|          |                                                  |               | rs5065     | 0.15 | coding        | *151R      |
|          |                                                  |               | rs5063     | 0.06 | coding        | V31M       |
|          |                                                  |               | rs198373   | 0.12 | flanking_5UTR |            |
|          |                                                  |               | rs632793   | 0.43 | flanking_5UTR |            |
|          |                                                  |               | rs198381   | 0.12 | flanking_3UTR |            |
|          |                                                  |               | rs198388   | 0.46 | flanking_3UTR |            |
| rs198389 | 0.45                                             | flanking_5UTR |            |      |               |            |
| 1        | Endothelin converting enzyme 1 (ECE1)            | NM_001397.1   | rs12406089 | 0.33 | flanking_5UTR |            |
|          |                                                  |               | rs3026913  | 0.17 | flanking_3UTR |            |
|          |                                                  |               | rs2038089  | 0.43 | intron        |            |
|          |                                                  |               | rs9426748  | 0.43 | intron        |            |
|          |                                                  |               | rs212517   | 0.44 | intron        |            |
|          |                                                  |               | rs3026883  | 0.27 | intron        |            |
|          |                                                  |               | rs212539   | 0.39 | intron        |            |
|          |                                                  |               | rs212540   | 0.39 | intron        |            |
|          |                                                  |               | rs3026869  | 0.03 | intron        |            |
|          |                                                  |               | rs4654916  | 0.05 | intron        |            |

|          |                                                                       |             |            |      |               |       |
|----------|-----------------------------------------------------------------------|-------------|------------|------|---------------|-------|
|          |                                                                       |             | rs213045   | 0.25 | flanking_5UTR |       |
| <b>1</b> | <b>Small heterodimer partner (NR0B2)</b>                              | NM_021969.1 | rs17162330 | 0.13 | flanking_3UTR |       |
|          |                                                                       |             | rs17340482 | 0.16 | flanking_3UTR |       |
|          |                                                                       |             | rs7504     | 0.31 | 3UTR          |       |
|          |                                                                       |             | rs6659176  | 0.09 | coding        | G170A |
|          |                                                                       |             | rs11581460 | 0.37 | flanking_5UTR |       |
| <b>1</b> | <b>Tyrosine kinase with Ig and EGF Factor homology domains (TIE1)</b> | NM_005424.2 | rs11210831 | 0.33 | flanking_5UTR |       |
|          |                                                                       |             | rs3120047  | 0.42 | flanking_5UTR |       |
|          |                                                                       |             | rs7527092  | 0.45 | intron        |       |
|          |                                                                       |             | rs1999595  | 0.15 | intron        |       |
|          |                                                                       |             | rs2991990  | 0.42 | intron        |       |
|          |                                                                       |             | rs1199039  | 0.43 | coding        | L990L |
|          |                                                                       |             | rs1098182  | 0.06 | intron        |       |
|          |                                                                       |             | rs11210834 | 0.23 | intron        |       |
| <b>1</b> | <b>Calcium-binding protein A4 (S100A4)</b>                            | NM_002961.2 | rs1810765  | 0.08 | flanking_5UTR |       |
|          |                                                                       |             | rs743687   | 0.16 | flanking_3UTR |       |
|          |                                                                       |             | rs730347   | 0.00 | flanking_3UTR |       |
|          |                                                                       |             | rs1051044  | 0.03 | 3UTR          |       |
|          |                                                                       |             | rs2071631  |      | coding        | E48E  |
|          |                                                                       |             | rs1005436  | 0.16 | flanking_5UTR |       |
| <b>1</b> | <b>C-reactive protein (CRP)</b>                                       | NM_000567.2 | rs2794520  | 0.33 | flanking_3UTR |       |
|          |                                                                       |             | rs2808630  | 0.28 | flanking_3UTR |       |
|          |                                                                       |             | rs1205     | 0.33 | 3UTR          |       |
|          |                                                                       |             | rs1130864  | 0.30 | 3UTR          |       |
|          |                                                                       |             | rs1800947  | 0.07 | coding        | L183L |
|          |                                                                       |             | rs1417938  | 0.33 | intron        |       |
|          |                                                                       |             | rs3091244  | 0.05 | flanking_5UTR |       |
|          |                                                                       |             | rs3093060  | 0.00 | flanking_5UTR |       |
| <b>2</b> | <b>Rho-associated protein kinase 2 (ROCK2)</b>                        | NM_004850.3 | rs2290156  | 0.31 | intron        |       |
|          |                                                                       |             | rs12470004 | 0.38 | intron        |       |
|          |                                                                       |             | rs2011812  | 0.42 | intron        |       |
|          |                                                                       |             | rs3771109  | 0.01 | intron        |       |
|          |                                                                       |             | rs9808232  | 0.42 | coding        | T430N |
|          |                                                                       |             | rs1868585  | 0.31 | intron        |       |
|          |                                                                       |             | rs6716817  | 0.50 | intron        |       |
|          |                                                                       |             | rs3771106  | 0.38 | intron        |       |
|          |                                                                       |             | rs1868584  | 0.19 | intron        |       |
|          |                                                                       |             | rs4669700  | 0.20 | intron        |       |
|          |                                                                       |             | rs4668720  | 0.24 | intron        |       |
|          |                                                                       |             | rs10929728 | 0.36 | intron        |       |
|          |                                                                       |             | rs11695377 | 0.20 | intron        |       |
|          |                                                                       |             | rs7575837  | 0.24 | intron        |       |
|          |                                                                       |             | rs7355489  | 0.24 | intron        |       |
| <b>2</b> | <b>Xanthine dehydrogenase (XDH)</b>                                   | NM_000379.2 | rs1042039  | 0.47 | flanking_3UTR |       |
|          |                                                                       |             | rs2268800  | 0.47 | intron        |       |
|          |                                                                       |             | rs207444   | 0.06 | intron        |       |

|          |                                                           |             |            |      |               |       |
|----------|-----------------------------------------------------------|-------------|------------|------|---------------|-------|
|          |                                                           |             | rs169596   | 0.48 | intron        |       |
|          |                                                           |             | rs4952085  | 0.23 | intron        |       |
|          |                                                           |             | rs1896846  | 0.27 | intron        |       |
|          |                                                           |             | rs7597755  | 0.02 | intron        |       |
|          |                                                           |             | rs992137   | 0.01 | intron        |       |
|          |                                                           |             | rs17038412 | 0.19 | intron        |       |
|          |                                                           |             | rs1366817  | 0.32 | intron        |       |
|          |                                                           |             | rs2281547  | 0.46 | intron        |       |
|          |                                                           |             | rs3769618  | 0.45 | intron        |       |
|          |                                                           |             | rs185925   | 0.23 | intron        |       |
|          |                                                           |             | rs206847   | 0.22 | intron        |       |
|          |                                                           |             | rs206851   | 0.21 | intron        |       |
|          |                                                           |             | rs206855   | 0.40 | intron        |       |
|          |                                                           |             | rs206857   | 0.18 | intron        |       |
|          |                                                           |             | rs206860   | 0.21 | intron        |       |
|          |                                                           |             | rs494852   | 0.14 | intron        |       |
|          |                                                           |             | rs1346644  | 0.13 | intron        |       |
|          |                                                           |             | rs3769616  | 0.02 | intron        |       |
|          |                                                           |             | rs206811   | 0.20 | intron        |       |
|          |                                                           |             | rs206812   | 0.32 | flanking_5UTR |       |
|          |                                                           |             | rs7575607  | 0.22 | flanking_5UTR |       |
| <b>2</b> | <b>Bone morphogenetic protein receptor type II (BMP2)</b> | NM_001204.5 | rs1980153  | 0.14 | intron        |       |
|          |                                                           |             | rs4303700  | 0.20 | intron        |       |
|          |                                                           |             | rs6435149  | 0.27 | intron        |       |
|          |                                                           |             | rs16839149 | 0.13 | intron        |       |
|          |                                                           |             | rs4675278  | 0.27 | intron        |       |
|          |                                                           |             | rs12477602 | 0.14 | intron        |       |
|          |                                                           |             | rs12621870 | 0.23 | intron        |       |
|          |                                                           |             | rs7605442  | 0.06 | intron        |       |
|          |                                                           |             | rs7562876  | 0.47 | intron        |       |
|          |                                                           |             | rs1199496  | 0.31 | intron        |       |
|          |                                                           |             | rs2228545  | 0.03 | coding        | S774N |
|          |                                                           |             | BMP2600    | na   | intron        |       |
| <b>2</b> | <b>Serotonin 2B receptor (HTR2B)</b>                      | NM_000867.2 | rs10191678 | 0.00 | flanking_3UTR |       |
|          |                                                           |             | rs6437000  | 0.23 | intron        |       |
|          |                                                           |             | rs10194776 | 0.33 | intron        |       |
|          |                                                           |             | rs1549339  | 0.26 | intron        |       |
|          |                                                           |             | rs17586428 | 0.03 | intron        |       |
|          |                                                           |             | rs3806545  | 0.06 | flanking_5UTR |       |
|          |                                                           |             | rs765458   | 0.25 | flanking_5UTR |       |
|          |                                                           |             | rs10498257 | 0.25 | flanking_5UTR |       |
| <b>3</b> | <b>Caveolin 3 (CAV3)</b>                                  | NM_033337.1 | rs12486403 | 0.19 | flanking_5UTR |       |
|          |                                                           |             | rs11926335 | 0.18 | flanking_5UTR |       |
|          |                                                           |             | rs10490801 | 0.17 | flanking_5UTR |       |
|          |                                                           |             | rs9816472  | 0.18 | flanking_5UTR |       |
|          |                                                           |             | rs237860   | 0.42 | flanking_5UTR |       |
|          |                                                           |             | rs237862   | 0.39 | flanking_5UTR |       |

|          |                                                                  |             |            |      |               |       |
|----------|------------------------------------------------------------------|-------------|------------|------|---------------|-------|
|          |                                                                  |             | rs2268485  | 0.38 | flanking_5UTR |       |
|          |                                                                  |             | rs2072581  | 0.18 | flanking_5UTR |       |
|          |                                                                  |             | rs1008642  | 0.22 | coding        | N32N  |
|          |                                                                  |             | rs1558991  | 0.23 | intron        |       |
|          |                                                                  |             | rs10490800 | 0.10 | intron        |       |
|          |                                                                  |             | rs13061909 | 0.18 | intron        |       |
|          |                                                                  |             | rs4686300  | 0.03 | intron        |       |
|          |                                                                  |             | rs237870   | 0.29 | intron        |       |
|          |                                                                  |             | rs237871   | 0.25 | intron        |       |
|          |                                                                  |             | rs237872   | 0.47 | intron        |       |
|          |                                                                  |             | rs151462   | 0.24 | intron        |       |
|          |                                                                  |             | rs237875   | 0.46 | intron        |       |
|          |                                                                  |             | rs13087941 | 0.28 | coding        | F40F  |
| <b>3</b> | <b>Peroxisome proliferator activated receptor, gamma (PPARG)</b> | NM_005037   | rs2972164  | 0.49 | intron        |       |
|          |                                                                  |             | rs4684846  | 0.22 | intron        |       |
|          |                                                                  |             | rs880663   | 0.21 | intron        |       |
|          |                                                                  |             | rs10510418 | 0.35 | intron        |       |
|          |                                                                  |             | rs1801282  | 0.08 | coding        |       |
|          |                                                                  |             | rs17817276 | 0.35 | intron        |       |
|          |                                                                  |             | rs2938395  | 0.38 | intron        |       |
|          |                                                                  |             | rs1151996  | 0.38 | intron        |       |
|          |                                                                  |             | rs1175540  | 0.34 | intron        |       |
|          |                                                                  |             | rs1175542  | 0.49 | intron        |       |
|          |                                                                  |             | rs1797912  | 0.40 | intron        |       |
|          |                                                                  |             | rs3856806  | 0.10 | coding        | H446H |
|          |                                                                  |             | rs1152003  | 0.32 | flanking_3UTR |       |
|          |                                                                  |             | kr1805192  | na   | intron        |       |
| <b>3</b> | <b>Retinoic acid receptor, beta (RARβ)</b>                       | NM_000965.2 | rs6550978  | 0.36 | intron        |       |
|          |                                                                  |             | rs6550980  | 0.19 | intron        |       |
|          |                                                                  |             | rs871963   | 0.35 | intron        |       |
|          |                                                                  |             | rs4607073  | 0.40 | intron        |       |
|          |                                                                  |             | rs11715516 | 0.16 | intron        |       |
|          |                                                                  |             | rs1432603  | 0.22 | intron        |       |
|          |                                                                  |             | rs1286656  | 0.10 | intron        |       |
|          |                                                                  |             | rs2056777  | 0.16 | intron        |       |
|          |                                                                  |             | rs1286641  | 0.32 | intron        |       |
|          |                                                                  |             | rs1153584  | 0.40 | intron        |       |
|          |                                                                  |             | rs1286646  | 0.15 | intron        |       |
|          |                                                                  |             | rs1881706  | 0.33 | intron        |       |
|          |                                                                  |             | rs1153589  | 0.18 | intron        |       |
|          |                                                                  |             | rs1153597  | 0.41 | intron        |       |
|          |                                                                  |             | rs1153598  | 0.10 | intron        |       |
|          |                                                                  |             | rs1153604  | 0.33 | intron        |       |
|          |                                                                  |             | rs1286665  | 0.23 | intron        |       |
|          |                                                                  |             | rs7616062  | 0.23 | intron        |       |
|          |                                                                  |             | rs1286773  | 0.10 | intron        |       |
|          |                                                                  |             | rs1286772  | 0.33 | intron        |       |

|          |                                                                    |             |            |      |               |       |
|----------|--------------------------------------------------------------------|-------------|------------|------|---------------|-------|
|          |                                                                    |             | rs1435706  | 0.35 | intron        |       |
|          |                                                                    |             | rs1626875  | 0.14 | intron        |       |
|          |                                                                    |             | rs1286765  | 0.46 | intron        |       |
|          |                                                                    |             | rs1286761  | 0.15 | intron        |       |
|          |                                                                    |             | rs12635379 | 0.22 | intron        |       |
|          |                                                                    |             | rs1656465  | 0.14 | intron        |       |
|          |                                                                    |             | rs1631354  | 0.48 | intron        |       |
|          |                                                                    |             | rs1730226  | 0.49 | intron        |       |
|          |                                                                    |             | rs9809535  | 0.11 | intron        |       |
| <b>3</b> | <b>Pregnane X receptor (NR1I2)</b>                                 | NM_003889.3 | rs7643038  | 0.40 | flanking_5UTR |       |
|          |                                                                    |             | rs2472671  | 0.11 | intron        |       |
|          |                                                                    |             | rs2472672  | 0.11 | intron        |       |
|          |                                                                    |             | rs1403527  | 0.11 | intron        |       |
|          |                                                                    |             | rs1403526  | 0.24 | intron        |       |
|          |                                                                    |             | rs4440154  | 0.35 | intron        |       |
|          |                                                                    |             | rs2461823  | 0.35 | intron        |       |
|          |                                                                    |             | rs7643645  | 0.30 | intron        |       |
|          |                                                                    |             | rs2472680  | 0.02 | intron        |       |
|          |                                                                    |             | rs3732357  | 0.23 | intron        |       |
|          |                                                                    |             | rs6784598  | 0.30 | intron        |       |
|          |                                                                    |             | rs3732359  | 0.07 | 3UTR          |       |
|          |                                                                    |             | rs1054190  | 0.18 | 3UTR          |       |
| <b>4</b> | <b>Recombination signal-binding protein 1 for J-kappa (RBPSUH)</b> | NM_005349.2 | rs3822223  | 0.06 | intron        |       |
|          |                                                                    |             | rs2077777  | 0.05 | intron        |       |
|          |                                                                    |             | rs1877207  | 0.48 | intron        |       |
|          |                                                                    |             | rs3762930  | 0.48 | intron        |       |
|          |                                                                    |             | rs2667065  | 0.03 | intron        |       |
|          |                                                                    |             | rs6821126  | 0.20 | intron        |       |
|          |                                                                    |             | rs4330343  | 0.20 | intron        |       |
|          |                                                                    |             | rs2725303  | 0.46 | intron        |       |
|          |                                                                    |             | rs3109836  | 0.20 | intron        |       |
|          |                                                                    |             | rs13109703 | 0.43 | intron        |       |
|          |                                                                    |             | rs13114911 | 0.43 | intron        |       |
|          |                                                                    |             | rs10517097 | 0.03 | intron        |       |
|          |                                                                    |             | rs946346   | 0.10 | intron        |       |
| <b>4</b> | <b>Nuclear factor kappa B p105 subunit (NFKB1)</b>                 | NM_003998.2 | rs980455   | 0.46 | flanking_5UTR |       |
|          |                                                                    |             | rs3774934  | 0.06 | intron        |       |
|          |                                                                    |             | rs1599961  | 0.46 | intron        |       |
|          |                                                                    |             | rs230533   | 0.37 | intron        |       |
|          |                                                                    |             | rs4647992  | 0.07 | intron        |       |
|          |                                                                    |             | rs230498   | 0.38 | intron        |       |
|          |                                                                    |             | rs4648072  | 0.02 | coding        | M506V |
|          |                                                                    |             | rs11722146 | 0.34 | intron        |       |
|          |                                                                    |             | rs4648099  | 0.00 | coding        | H711Q |
|          |                                                                    |             | rs3774968  | 0.34 | intron        |       |
|          |                                                                    |             | rs4648110  | 0.22 | intron        |       |
|          |                                                                    |             | rs1609798  | 0.35 | intron        |       |

|   |                                                      |                |            |      |               |       |
|---|------------------------------------------------------|----------------|------------|------|---------------|-------|
|   |                                                      |                | rs997476   | 0.10 | flanking_3UTR |       |
| 4 | <b>Phosphodiesterase 5 (PDE5A)</b>                   | NM_001083.3    | rs17006190 | 0.22 | 3UTR          |       |
|   |                                                      |                | rs3775843  | 0.22 | intron        |       |
|   |                                                      |                | rs1480933  | 0.44 | intron        |       |
|   |                                                      |                | rs10003953 | 0.00 | intron        |       |
|   |                                                      |                | rs1155576  | 0.22 | intron        |       |
|   |                                                      |                | rs10034450 | 0.19 | intron        |       |
|   |                                                      |                | rs11731756 | 0.22 | intron        |       |
|   |                                                      |                | rs2248236  | 0.23 | intron        |       |
|   |                                                      |                | rs3733526  | 0.18 | coding        | A92V  |
| 4 | <b>Endothelin receptor, type A (EDNRA)</b>           | NM_001957.1    | rs6842241  | 0.16 | flanking_5UTR |       |
|   |                                                      |                | rs6823537  | 0.29 | intron        |       |
|   |                                                      |                | rs7655670  | 0.33 | intron        |       |
|   |                                                      |                | rs4563479  | 0.10 | intron        |       |
|   |                                                      |                | rs1568136  | 0.23 | intron        |       |
|   |                                                      |                | rs6827096  | 0.16 | intron        |       |
|   |                                                      |                | rs1878404  | 0.18 | intron        |       |
|   |                                                      |                | rs10008744 | 0.22 | intron        |       |
|   |                                                      |                | rs2048894  | 0.24 | intron        |       |
|   |                                                      |                | rs5333     | 0.23 | coding        | H322H |
|   |                                                      |                | rs5343     | 0.38 | 3UTR          |       |
| 5 | <b>Betaine-homocysteine methyltransferase (BHMT)</b> | NM_001713.1    | rs542852   | 0.38 | intron        |       |
|   |                                                      |                | rs492842   | 0.42 | intron        |       |
|   |                                                      |                | rs567754   | 0.29 | intron        |       |
|   |                                                      |                | rs3733890  | 0.28 | coding        | R238Q |
| 5 | <b>CD14 molecule (CD14)</b>                          | NM_000591.1    | rs4914     | 0.09 | coding        | L366L |
|   |                                                      |                | rs2569190  | 0.47 | flanking_5UTR |       |
|   |                                                      |                | rs2569193  | 0.23 | flanking_5UTR |       |
| 6 | <b>Endothelin 1 (EDN1)</b>                           | NM_001955.2    | rs3087459  | 0.18 | flanking_5UTR |       |
|   |                                                      |                | rs1476046  | 0.25 | intron        |       |
|   |                                                      |                | rs2071942  |      | intron        |       |
|   |                                                      |                | rs1630736  | 0.49 | intron        |       |
|   |                                                      |                | rs5370     | 0.24 | coding        | K197N |
|   |                                                      |                | rs2859338  | 0.42 | flanking_3UTR |       |
|   |                                                      |                | rs6906760  | 0.06 | flanking_3UTR |       |
| 6 | <b>Tumor necrosis factor (TNF)</b>                   | NM_000594.2    | rs2844482  | 0.16 | flanking_5UTR |       |
|   |                                                      |                | rs2229094  | 0.26 | coding        | C12R  |
|   |                                                      |                | rs1800630  | 0.09 | flanking_3UTR |       |
|   |                                                      |                | rs11574936 | 0.00 | coding        | I193N |
|   |                                                      |                | rs769177   | 0.03 | flanking_3UTR |       |
| 6 | <b>Complement component 4A (C4A)</b>                 | NM_007293      | rs3093559  | 0.02 | flanking_3UTR |       |
|   |                                                      |                | rs389883   | 0.36 | intron        |       |
|   |                                                      |                | rs389512   | 0.08 | intron        |       |
|   |                                                      |                | rs12525076 | 0.42 | intron        |       |
| 6 | <b>Vascular endothelial growth factor (VEGF)</b>     | NM_001025366.1 | rs833060   | 0.30 | flanking_5UTR |       |
|   |                                                      |                | rs699947   | 0.41 | flanking_5UTR |       |

|          |                                                     |             |            |      |               |       |
|----------|-----------------------------------------------------|-------------|------------|------|---------------|-------|
|          |                                                     |             | rs2010963  | 0.42 | 5UTR          |       |
|          |                                                     |             | rs833069   | 0.34 | intron        |       |
|          |                                                     |             | rs3025010  | 0.35 | intron        |       |
|          |                                                     |             | rs3025033  | 0.18 | intron        |       |
|          |                                                     |             | rs3025035  | 0.10 | intron        |       |
| <b>6</b> | <b>Estrogen receptor 1 (ESR1)</b>                   | NM_000125.2 | rs488133   | 0.32 | flanking_5UTR |       |
|          |                                                     |             | rs2077647  | 0.48 | coding        | S9S   |
|          |                                                     |             | rs532010   | 0.32 | intron        |       |
|          |                                                     |             | rs6902771  | 0.42 | intron        |       |
|          |                                                     |             | rs2234693  | 0.41 | intron        |       |
|          |                                                     |             | rs1709182  | 0.37 | intron        |       |
|          |                                                     |             | rs712221   | 0.41 | intron        |       |
|          |                                                     |             | rs11155819 | 0.35 | intron        |       |
|          |                                                     |             | rs9340835  | 0.37 | intron        |       |
|          |                                                     |             | rs1913474  | 0.21 | intron        |       |
|          |                                                     |             | rs2347867  | 0.30 | intron        |       |
|          |                                                     |             | rs4870062  | 0.28 | intron        |       |
|          |                                                     |             | rs6927072  | 0.28 | intron        |       |
|          |                                                     |             | rs1801132  | 0.18 | coding        | P324P |
|          |                                                     |             | rs3020314  | 0.29 | intron        |       |
|          |                                                     |             | rs3020317  | 0.12 | intron        |       |
|          |                                                     |             | rs1884051  | 0.30 | intron        |       |
|          |                                                     |             | rs6557177  | 0.17 | intron        |       |
|          |                                                     |             | rs985694   | 0.12 | intron        |       |
|          |                                                     |             | rs3020403  | 0.23 | intron        |       |
|          |                                                     |             | rs932477   | 0.03 | intron        |       |
|          |                                                     |             | rs926777   | 0.18 | intron        |       |
|          |                                                     |             | rs3020328  | 0.19 | intron        |       |
|          |                                                     |             | rs7754762  | 0.07 | intron        |       |
|          |                                                     |             | rs7757956  | 0.19 | intron        |       |
|          |                                                     |             | rs3020411  | 0.39 | intron        |       |
|          |                                                     |             | rs2982712  | 0.48 | intron        |       |
|          |                                                     |             | rs3020368  | 0.13 | intron        |       |
|          |                                                     |             | rs9322354  | 0.07 | intron        |       |
|          |                                                     |             | rs9479190  | 0.08 | intron        |       |
|          |                                                     |             | rs2982896  | 0.32 | intron        |       |
|          |                                                     |             | rs3020381  | 0.40 | intron        |       |
|          |                                                     |             | rs2474148  | 0.36 | intron        |       |
|          |                                                     |             | rs2813544  | 0.22 | flanking_3UTR |       |
|          |                                                     |             | rs2747649  | 0.23 | flanking_3UTR |       |
|          |                                                     |             | rs1543403  | 0.45 | flanking_3UTR |       |
| <b>6</b> | <b>Superoxide dismutase 2, mitochondrial (SOD2)</b> | NM_00636.2  | rs2758329  | 0.46 | flanking_3UTR |       |
|          |                                                     |             | rs8031     | 0.43 | intron        |       |
|          |                                                     |             | rs5746136  | 0.28 | 3UTR          |       |
| <b>6</b> | <b>Plasminogen (PLG)</b>                            | NM_000301.1 | rs9458005  | 0.21 | flanking_5UTR |       |
|          |                                                     |             | rs783144   | 0.27 | flanking_5UTR |       |
|          |                                                     |             | rs2314852  | 0.19 | flanking_5UTR |       |

|   |                                                     |             |            |      |               |       |
|---|-----------------------------------------------------|-------------|------------|------|---------------|-------|
|   |                                                     |             | rs1950562  | 0.39 | flanking_5UTR |       |
|   |                                                     |             | rs1819138  | 0.02 | intron        |       |
|   |                                                     |             | rs4252092  | 0.42 | intron        |       |
|   |                                                     |             | rs1465620  | 0.25 | intron        |       |
|   |                                                     |             | rs783147   | 0.42 | intron        |       |
|   |                                                     |             | rs1321201  | 0.43 | intron        |       |
|   |                                                     |             | rs783146   | 0.11 | intron        |       |
|   |                                                     |             | rs13231    | 0.32 | coding        | Q360Q |
|   |                                                     |             | rs4252125  | 0.33 | coding        | D471N |
|   |                                                     |             | rs783145   | 0.48 | intron        |       |
|   |                                                     |             | rs813641   | 0.11 | intron        |       |
|   |                                                     |             | rs3757017  | 0.25 | intron        |       |
|   |                                                     |             | rs4252151  | 0.47 | intron        |       |
|   |                                                     |             | rs4252166  | 0.22 | intron        |       |
|   |                                                     |             | rs783176   | 0.13 | intron        |       |
|   |                                                     |             | rs11060    | 0.47 | coding        | G761G |
|   |                                                     |             | rs4252200  | 0.04 | flanking_3UTR |       |
|   |                                                     |             | rs783166   | 0.13 | flanking_3UTR |       |
| 7 | <b>Ikaros (IKZF1)</b>                               | NM_006060.2 | rs6976046  | 0.03 | intron        |       |
|   |                                                     |             | rs7789106  | 0.02 | intron        |       |
|   |                                                     |             | rs10230385 | 0.21 | intron        |       |
|   |                                                     |             | rs6962370  | 0.19 | intron        |       |
|   |                                                     |             | rs6964823  | 0.47 | intron        |       |
|   |                                                     |             | rs6952409  | 0.28 | intron        |       |
|   |                                                     |             | rs6973210  | 0.32 | intron        |       |
| 7 | <b>Elastin (ELN)</b>                                | NM_000501.1 | rs3757583  | 0.13 | flanking_5UTR |       |
|   |                                                     |             | rs868005   | 0.37 | intron        |       |
|   |                                                     |             | rs4717865  | 0.14 | intron        |       |
|   |                                                     |             | rs10949834 | 0.16 | intron        |       |
|   |                                                     |             | rs11770302 | 0.16 | flanking_3UTR |       |
| 7 | <b>Plasminogen activator inhibitor 1 (SERPINE1)</b> | NM_000602.1 | rs6950982  | 0.23 | flanking_5UTR |       |
|   |                                                     |             | rs6465787  | 0.02 | flanking_5UTR |       |
|   |                                                     |             | rs6956010  | 0.23 | flanking_5UTR |       |
|   |                                                     |             | rs2227631  | 0.40 | flanking_5UTR |       |
|   |                                                     |             | rs6090     | 0.01 | coding        | V16I  |
|   |                                                     |             | rs2227708  | 0.03 | intron        |       |
|   |                                                     |             | rs2070682  | 0.48 | intron        |       |
|   |                                                     |             | rs1050813  | 0.19 | 3UTR          |       |
|   |                                                     |             | rs2227714  | 0.06 | 3UTR          |       |
| 7 | <b>Caveolin 2 (CAV2)</b>                            | NM_001233.3 | rs987791   | 0.10 | flanking_5UTR |       |
|   | <b>Caveolin 1 (CAV1)</b>                            | NM_001753.3 | rs4730742  | 0.19 | flanking_5UTR |       |
|   |                                                     |             | rs8940     | 0.20 | coding        | A129E |
|   |                                                     |             | rs4727833  | 0.47 | 3UTR          |       |
|   |                                                     |             | rs1052990  | 0.38 | 3UTR          |       |
|   |                                                     |             | rs6466579  | 0.47 | flanking_3UTR |       |
|   |                                                     |             | rs2024211  | 0.28 | flanking_3UTR |       |
|   |                                                     |             | rs4236601  | 0.28 | flanking_5UTR |       |



|          |                                       |             |            |      |               |       |
|----------|---------------------------------------|-------------|------------|------|---------------|-------|
|          |                                       |             | rs926198   | 0.34 | intron        |       |
|          |                                       |             | rs9649394  | 0.42 | intron        |       |
|          |                                       |             | rs6466583  | 0.16 | intron        |       |
|          |                                       |             | rs10256914 | 0.25 | intron        |       |
|          |                                       |             | rs1474510  | 0.15 | intron        |       |
|          |                                       |             | rs3807986  | 0.26 | intron        |       |
|          |                                       |             | rs3807989  | 0.44 | intron        |       |
|          |                                       |             | rs3801993  | 0.10 | intron        |       |
|          |                                       |             | rs729949   | 0.28 | intron        |       |
|          |                                       |             | rs3807994  | 0.28 | intron        |       |
|          |                                       |             | rs6466587  | 0.18 | intron        |       |
|          |                                       |             | rs1049337  | 0.25 | 3UTR          |       |
| <b>7</b> | <b>Nitric oxide synthase 3 (NOS3)</b> | NM_000603.3 | rs10277237 | 0.27 | flanking_5UTR |       |
|          |                                       |             | rs2070744  | 0.00 | intron        |       |
|          |                                       |             | rs3918166  | 0.00 | coding        | R111Q |
|          |                                       |             | rs1799983  | 0.34 | coding        | D297E |
|          |                                       |             | rs3918227  | 0.13 | intron        |       |
|          |                                       |             | rs3730006  | 0.01 | intron        |       |
|          |                                       |             | rs3918232  | 0.01 | coding        | V826M |
|          |                                       |             | rs743507   | 0.18 | intron        |       |
|          |                                       |             | rs3918234  | 0.02 | coding        | Q981L |
|          |                                       |             | rs2566518  | 0.02 | intron        |       |
| <b>8</b> | <b>Angiopoietin 1 (ANGPT1)</b>        | NM_001146.3 | rs1954727  | 0.30 | 3UTR          |       |
|          |                                       |             | rs2514872  | 0.13 | intron        |       |
|          |                                       |             | rs2514878  | 0.36 | intron        |       |
|          |                                       |             | rs10505101 | 0.23 | intron        |       |
|          |                                       |             | rs10505102 | 0.11 | intron        |       |
|          |                                       |             | rs4354281  | 0.11 | intron        |       |
|          |                                       |             | rs4236785  | 0.21 | intron        |       |
|          |                                       |             | rs4324901  | 0.38 | intron        |       |
|          |                                       |             | rs6469108  | 0.47 | intron        |       |
|          |                                       |             | rs7011605  | 0.24 | intron        |       |
|          |                                       |             | rs4626569  | 0.08 | intron        |       |
|          |                                       |             | rs1283651  | 0.24 | intron        |       |
|          |                                       |             | rs1433195  | 0.15 | intron        |       |
|          |                                       |             | rs2217673  | 0.13 | intron        |       |
|          |                                       |             | rs2163870  | 0.43 | intron        |       |
|          |                                       |             | rs2514857  | 0.47 | intron        |       |
|          |                                       |             | rs1654718  | 0.20 | intron        |       |
|          |                                       |             | rs1433175  | 0.32 | intron        |       |
|          |                                       |             | rs1654725  | 0.40 | intron        |       |
|          |                                       |             | rs1433179  | 0.40 | intron        |       |
|          |                                       |             | rs1654730  | 0.40 | intron        |       |
|          |                                       |             | rs4268102  | 0.25 | intron        |       |
|          |                                       |             | rs1283695  | 0.15 | intron        |       |
|          |                                       |             | rs1283673  | 0.43 | intron        |       |
|          |                                       |             | rs1433189  | 0.23 | intron        |       |
|          |                                       |             | rs1283701  | 0.40 | intron        |       |

|          |                                                      |             |            |      |               |        |
|----------|------------------------------------------------------|-------------|------------|------|---------------|--------|
|          |                                                      |             | rs1283698  | 0.11 | intron        |        |
|          |                                                      |             | rs4734967  | 0.31 | intron        |        |
|          |                                                      |             | rs2916084  | 0.36 | intron        |        |
|          |                                                      |             | rs1368495  | 0.31 | intron        |        |
|          |                                                      |             | rs4114169  | 0.37 | intron        |        |
|          |                                                      |             | rs1654680  | 0.15 | intron        |        |
|          |                                                      |             | rs1433165  | 0.43 | intron        |        |
|          |                                                      |             | rs1283720  | 0.17 | intron        |        |
|          |                                                      |             | rs1433168  | 0.43 | intron        |        |
|          |                                                      |             | rs10505108 | 0.06 | intron        |        |
|          |                                                      |             | rs17302560 | 0.34 | intron        |        |
| <b>9</b> | <b>Cyclin-dependent kinase inhibitor 2A (CDKN2A)</b> | NM_000077.3 | rs3731257  | 0.27 | flanking_3UTR |        |
|          |                                                      |             | rs11515    | 0.13 | 3UTR          |        |
|          |                                                      |             | rs2518719  | 0.15 | intron        |        |
|          |                                                      |             | rs3731246  | 0.09 | intron        |        |
|          |                                                      |             | rs2811708  | 0.25 | intron        |        |
|          |                                                      |             | rs3731239  | 0.38 | intron        |        |
|          |                                                      |             | rs2811709  | 0.11 | intron        |        |
|          |                                                      |             | rs4074785  | 0.10 | intron        |        |
|          |                                                      |             | rs3731221  | 0.01 | intron        |        |
|          |                                                      |             | rs3731198  | 0.15 | intron        |        |
|          |                                                      |             | rs3218020  | 0.36 | flanking_5UTR |        |
|          |                                                      |             | rs2811712  | 0.11 | flanking_5UTR |        |
|          |                                                      |             | rs3218009  | 0.10 | flanking_5UTR |        |
| <b>9</b> | <b>Tenascin C (TNC)</b>                              | NM_002160.1 | rs1888221  | 0.25 | flanking_3UTR |        |
|          |                                                      |             | rs1330362  | 0.05 | flanking_3UTR |        |
|          |                                                      |             | rs13321    | 0.29 | coding        | E2007Q |
|          |                                                      |             | rs3789875  | 0.28 | intron        |        |
|          |                                                      |             | rs2274751  | 0.08 | intron        |        |
|          |                                                      |             | rs953288   | 0.38 | intron        |        |
|          |                                                      |             | rs1547691  | 0.28 | intron        |        |
|          |                                                      |             | rs1330368  | 0.47 | intron        |        |
|          |                                                      |             | rs944225   | 0.25 | intron        |        |
|          |                                                      |             | rs1330349  | 0.43 | intron        |        |
|          |                                                      |             | rs1330351  | 0.48 | intron        |        |
|          |                                                      |             | rs944227   | 0.44 | intron        |        |
|          |                                                      |             | rs1617917  | 0.33 | intron        |        |
|          |                                                      |             | rs1250019  | 0.44 | intron        |        |
|          |                                                      |             | rs1330360  | 0.41 | intron        |        |
|          |                                                      |             | rs3748166  | 0.28 | intron        |        |
| <b>9</b> | <b>Endoglin (ENG)</b>                                | NM_000118.1 | rs4451422  | 0.34 | flanking_3UTR |        |
|          |                                                      |             | rs1330684  | 0.33 | intron        |        |
|          |                                                      |             | rs5031024  | 0.03 | intron        |        |
|          |                                                      |             | rs10819309 | 0.50 | intron        |        |
|          |                                                      |             | rs12001427 | 0.04 | intron        |        |
|          |                                                      |             | rs1800956  | 0.01 | coding        | D365H  |
|          |                                                      |             | rs3739817  | 0.08 | coding        | T342T  |

|           |                                                              |               |            |      |               |  |
|-----------|--------------------------------------------------------------|---------------|------------|------|---------------|--|
|           |                                                              |               | rs10987750 | 0.33 | intron        |  |
|           |                                                              |               | rs11792480 | 0.36 | intron        |  |
|           |                                                              |               | rs10121110 | 0.44 | intron        |  |
|           |                                                              |               | rs10819312 | 0.13 | intron        |  |
|           |                                                              |               | rs4836585  | 0.14 | intron        |  |
|           |                                                              |               | rs4837192  | 0.14 | intron        |  |
|           |                                                              |               | rs10987759 | 0.09 | flanking_5UTR |  |
|           |                                                              |               | rs7865146  | 0.27 | flanking_5UTR |  |
| <b>10</b> | <b>Growth differentiation factor 2 (GDF2)</b>                | NM_016204.1   | rs9325886  | 0.08 | flanking_3UTR |  |
|           |                                                              |               | rs9421799  | 0.37 | flanking_3UTR |  |
|           |                                                              |               | rs3740297  | 0.02 | 3UTR          |  |
|           |                                                              |               | rs7923671  | 0.04 | intron        |  |
|           |                                                              |               | rs11204215 | 0.13 | flanking_5UTR |  |
| <b>10</b> | <b>Bone morphogenetic protein receptor type 1a (BMPRI1A)</b> | NM_004329.2   | rs3905377  | 0.31 | flanking_5UTR |  |
|           |                                                              |               | rs7072166  | 0.01 | intron        |  |
|           |                                                              |               | rs6586034  | 0.39 | intron        |  |
|           |                                                              |               | rs7088641  | 0.31 | intron        |  |
|           |                                                              |               | rs11202169 | 0.02 | intron        |  |
|           |                                                              |               | rs7096781  | 0.28 | intron        |  |
|           |                                                              |               | rs4933411  | 0.31 | intron        |  |
|           |                                                              |               | rs6586039  | 0.03 | intron        |  |
|           |                                                              |               | rs4934268  | 0.38 | intron        |  |
|           |                                                              |               | rs4934272  | 0.22 | intron        |  |
|           |                                                              |               | rs1124482  | 0.34 | intron        |  |
|           |                                                              |               | rs11202221 | 0.19 | intron        |  |
|           |                                                              |               | rs2354354  | 0.30 | intron        |  |
|           |                                                              |               | rs2883420  | 0.42 | intron        |  |
|           |                                                              |               | rs7894198  | 0.09 | intron        |  |
|           |                                                              |               | rs4934275  | 0.13 | intron        |  |
|           |                                                              |               | rs10749542 | 0.25 | intron        |  |
|           |                                                              |               | rs12777504 | 0.03 | intron        |  |
|           |                                                              |               | rs12269120 | 0.02 | intron        |  |
|           |                                                              |               | rs7909264  | 0.10 | flanking_3UTR |  |
| <b>10</b> | <b>Nuclear factor kappa B p100 subunit (NFKB2)</b>           | NM_01077493.1 | rs1572532  | 0.00 | flanking_5UTR |  |
|           |                                                              |               | rs11574845 | 0.00 | intron        |  |
|           |                                                              |               | rs7897947  | 0.16 | intron        |  |
|           |                                                              |               | rs7077329  | na   | intron        |  |
|           |                                                              |               | rs1056890  | 0.36 | 3UTR          |  |
| <b>11</b> | <b>Tryptophan hydroxylase (TPH1)</b>                         | NM_004179.1   | rs10741734 | 0.40 | intron        |  |
|           |                                                              |               | rs211102   | 0.17 | intron        |  |
|           |                                                              |               | rs1799913  | na   | intron        |  |
|           |                                                              |               | rs1800532  | 0.38 | intron        |  |
|           |                                                              |               | rs10488683 | 0.50 | intron        |  |
|           |                                                              |               | rs172423   | 0.33 | intron        |  |
|           |                                                              |               | rs10488682 | 0.33 | flanking_5UTR |  |
|           |                                                              |               | rs623580   | 0.28 | flanking_5UTR |  |

|    |                                                                            |             |            |      |               |       |
|----|----------------------------------------------------------------------------|-------------|------------|------|---------------|-------|
| 11 | <b>Nuclear factor kappa B p65 subunit (RELA)</b>                           | NM_021975.2 | rs1466462  | 0.38 | flanking_3UTR |       |
|    |                                                                            |             | rs1049728  | 0.03 | flanking_3UTR |       |
|    |                                                                            |             | rs11227247 | 0.16 | intron        |       |
|    |                                                                            |             | rs7101916  | 0.16 | flanking_5UTR |       |
| 11 | <b>NADPH Oxidase 4 (NOX4)</b>                                              | NM_016931.2 | rs11821838 | 0.11 | intron        |       |
|    |                                                                            |             | rs317187   | 0.40 | intron        |       |
|    |                                                                            |             | rs1847137  | 0.31 | intron        |       |
|    |                                                                            |             | rs7944576  | 0.08 | intron        |       |
|    |                                                                            |             | rs317150   | 0.10 | intron        |       |
|    |                                                                            |             | rs317155   | 0.44 | intron        |       |
|    |                                                                            |             | rs546460   | 0.43 | intron        |       |
|    |                                                                            |             | rs2202150  | 0.38 | intron        |       |
|    |                                                                            |             | rs317147   | 0.45 | intron        |       |
|    |                                                                            |             | rs538102   | 0.47 | intron        |       |
|    |                                                                            |             | rs319016   | 0.45 | intron        |       |
|    |                                                                            |             | rs957140   | 0.43 | intron        |       |
|    |                                                                            |             | rs10830277 | 0.13 | intron        |       |
|    |                                                                            |             | rs2164521  | 0.10 | intron        |       |
|    |                                                                            |             | rs614128   | 0.08 | intron        |       |
|    |                                                                            |             | rs497279   | 0.27 | intron        |       |
|    |                                                                            |             | rs3017887  | 0.09 | flanking_5UTR |       |
|    |                                                                            |             | rs585197   | 0.21 | flanking_5UTR |       |
|    |                                                                            |             | rs553635   | 0.09 | flanking_5UTR |       |
| 11 | <b>Transient receptor potential cation channel, subfamily C, 6 (TRPC6)</b> | NM_004621.3 | rs11826762 | 0.09 | intron        |       |
|    |                                                                            |             | rs11224779 | 0.33 | intron        |       |
|    |                                                                            |             | rs11224783 | 0.25 | intron        |       |
|    |                                                                            |             | rs11821584 | 0.36 | intron        |       |
|    |                                                                            |             | rs7945727  | 0.12 | intron        |       |
|    |                                                                            |             | rs4403777  | 0.48 | intron        |       |
|    |                                                                            |             | rs7925012  | 0.47 | intron        |       |
|    |                                                                            |             | rs7101962  | 0.11 | intron        |       |
|    |                                                                            |             | rs7931676  | 0.32 | intron        |       |
|    |                                                                            |             | rs10895131 | 0.12 | intron        |       |
|    |                                                                            |             | rs4469857  | 0.37 | intron        |       |
|    |                                                                            |             | rs4331057  | 0.36 | intron        |       |
|    |                                                                            |             | rs10895142 | 0.08 | intron        |       |
|    |                                                                            |             | rs10895146 | 0.48 | intron        |       |
|    |                                                                            |             | rs10501985 | 0.48 | intron        |       |
|    |                                                                            |             | rs7103450  | 0.16 | intron        |       |
|    |                                                                            |             | rs7121108  | 0.15 | intron        |       |
|    |                                                                            |             | rs10895150 | 0.09 | flanking_5UTR |       |
| 11 | <b>Matrix metalloproteinase 3 (MMP3)</b>                                   | NM_002422.3 | rs4754884  | 0.42 | flanking_3UTR |       |
|    |                                                                            |             | rs650108   | 0.23 | intron        |       |
|    |                                                                            |             | rs520540   | 0.41 | coding        | A361A |
|    |                                                                            |             | rs566125   | 0.11 | intron        |       |
|    |                                                                            |             | rs679620   | 0.43 | coding        | K44E  |

|           |                                                                   |             |            |      |               |        |
|-----------|-------------------------------------------------------------------|-------------|------------|------|---------------|--------|
|           |                                                                   |             | rs522616   | 0.13 | flanking_5UTR |        |
| <b>12</b> | <b>Potassium channel, voltage-gated, shaker, member 5 (KCNA5)</b> | NM_002234.2 | rs7973471  | 0.11 | flanking_5UTR |        |
|           |                                                                   |             | rs7298858  | 0.12 | flanking_5UTR |        |
|           |                                                                   |             | rs887353   | 0.25 | flanking_5UTR |        |
|           |                                                                   |             | rs11615552 | 0.10 | flanking_5UTR |        |
|           |                                                                   |             | rs3741930  | 0.35 | 5UTR          |        |
|           |                                                                   |             | rs1860420  | 0.48 | flanking_3UTR |        |
|           |                                                                   |             | rs12311859 | 0.25 | flanking_3UTR |        |
|           |                                                                   |             | rs10774297 | 0.09 | flanking_3UTR |        |
|           |                                                                   |             | rs7302727  | 0.20 | flanking_3UTR |        |
| <b>12</b> | <b>Von Willebrand factor (VWF)</b>                                | NM_000552.2 | rs3809241  | 0.22 | flanking_5UTR |        |
|           |                                                                   |             | rs7976955  | 0.22 | flanking_3UTR |        |
|           |                                                                   |             | rs2270151  | 0.13 | intron        |        |
|           |                                                                   |             | rs2286646  | 0.22 | intron        |        |
|           |                                                                   |             | rs10774387 | 0.22 | intron        |        |
|           |                                                                   |             | rs723189   | 0.41 | intron        |        |
|           |                                                                   |             | rs4764478  | 0.24 | intron        |        |
|           |                                                                   |             | rs917857   | 0.44 | intron        |        |
|           |                                                                   |             | rs917858   | 0.33 | intron        |        |
|           |                                                                   |             | rs2239138  | 0.33 | intron        |        |
|           |                                                                   |             | rs216856   | 0.27 | intron        |        |
|           |                                                                   |             | rs216867   | 0.08 | coding        | T2412T |
|           |                                                                   |             | rs2058473  | 0.43 | intron        |        |
|           |                                                                   |             | rs216873   | 0.13 | intron        |        |
|           |                                                                   |             | rs216891   | 0.48 | intron        |        |
|           |                                                                   |             | rs216893   | 0.47 | intron        |        |
|           |                                                                   |             | rs216902   | 0.26 | coding        | C1947C |
|           |                                                                   |             | rs216905   | 0.24 | intron        |        |
|           |                                                                   |             | rs216805   | 0.29 | intron        |        |
|           |                                                                   |             | rs216812   | 0.31 | intron        |        |
|           |                                                                   |             | rs542993   | 0.46 | intron        |        |
|           |                                                                   |             | rs216312   | 0.48 | intron        |        |
|           |                                                                   |             | rs11609815 | 0.24 | intron        |        |
|           |                                                                   |             | rs216330   | 0.31 | intron        |        |
|           |                                                                   |             | rs216333   | 0.25 | intron        |        |
|           |                                                                   |             | rs11614912 | 0.22 | intron        |        |
|           |                                                                   |             | rs10849378 | 0.26 | intron        |        |
|           |                                                                   |             | rs11064004 | 0.29 | intron        |        |
|           |                                                                   |             | rs216290   | 0.13 | intron        |        |
|           |                                                                   |             | rs1063856  | 0.34 | coding        | T788A  |
|           |                                                                   |             | rs216303   | 0.12 | intron        |        |
|           |                                                                   |             | rs980130   | 0.31 | intron        |        |
|           |                                                                   |             | rs980131   | 0.38 | intron        |        |
|           |                                                                   |             | rs1800378  | 0.38 | coding        | H483R  |
|           |                                                                   |             | rs2238104  | 0.44 | intron        |        |
|           |                                                                   |             | rs2109118  | 0.48 | intron        |        |
|           |                                                                   |             | rs2239144  | 0.09 | intron        |        |

|    |                                                         |             |            |      |               |       |
|----|---------------------------------------------------------|-------------|------------|------|---------------|-------|
|    |                                                         |             | rs3782716  | 0.35 | intron        |       |
|    |                                                         |             | rs10849387 | 0.35 | flanking_5UTR |       |
| 12 | <b>Elastase 1 (ELA1)</b>                                | NM_001971.4 | rs4762040  | 0.37 | intron        |       |
|    |                                                         |             | rs4762041  | 0.28 | intron        |       |
|    |                                                         |             | rs3843650  | 0.38 | intron        |       |
|    |                                                         |             | rs7311196  | 0.18 | flanking_5UTR |       |
|    |                                                         |             | rs7138439  | 0.37 | 3UTR          |       |
|    |                                                         |             | rs10876162 | 0.37 | intron        |       |
|    |                                                         |             | rs3847862  | 0.46 | intron        |       |
|    |                                                         |             | rs17860299 |      | coding        | R43W  |
| 12 | <b>Activin A receptor, type II-like kinase (ACVRL1)</b> | NM_000020.1 | rs3759178  | 0.35 | flanking_5UTR |       |
|    |                                                         |             | rs11169953 | 0.23 | intron        |       |
|    |                                                         |             | rs706812   | 0.00 | intron        |       |
|    |                                                         |             | rs2071219  |      | intron        |       |
|    |                                                         |             | rs706815   | 0.17 | intron        |       |
|    |                                                         |             | rs706824   | 0.22 | flanking_3UTR |       |
| 12 | <b>Retinoic acid receptor, gamma (RARG)</b>             | NM_000966.3 | rs1554753  | 0.20 | flanking_3UTR |       |
|    |                                                         |             | rs3741434  | 0.12 | 3UTR          |       |
|    |                                                         |             | rs2229774  | 0.04 | coding        | S426L |
|    |                                                         |             | rs1465057  | 0.06 | intron        |       |
|    |                                                         |             | rs6580936  | 0.16 | intron        |       |
|    |                                                         |             | rs7398676  | 0.48 | flanking_5UTR |       |
| 12 | <b>Tryptophan hydroxylase 2 (TPH2)</b>                  | NM_173353.2 | rs472197   | 0.44 | intron        |       |
|    |                                                         |             | rs10748185 | 0.44 | intron        |       |
|    |                                                         |             | rs2129575  | 0.20 | intron        |       |
|    |                                                         |             | rs1843809  | 0.13 | intron        |       |
|    |                                                         |             | rs1386494  | 0.13 | intron        |       |
|    |                                                         |             | rs1386493  | 0.15 | intron        |       |
|    |                                                         |             | rs1386492  | 0.15 | intron        |       |
|    |                                                         |             | rs6582078  | 0.34 | intron        |       |
|    |                                                         |             | rs1007023  | 0.12 | intron        |       |
|    |                                                         |             | rs1386497  | 0.12 | intron        |       |
|    |                                                         |             | rs1352250  | 0.38 | intron        |       |
|    |                                                         |             | rs1487278  | 0.22 | intron        |       |
|    |                                                         |             | rs9325202  | 0.35 | intron        |       |
|    |                                                         |             | rs1386486  | 0.30 | intron        |       |
|    |                                                         |             | rs7309440  | 0.02 | flanking_3UTR |       |
|    |                                                         |             | rs300510   | 0.46 | intron        |       |
| 12 | <b>Farnesoid X receptor (NR1H4)</b>                     | NM_005123.1 | rs11110390 | 0.32 | intron        |       |
|    |                                                         |             | rs4764980  | 0.49 | intron        |       |
|    |                                                         |             | rs17030285 | 0.14 | intron        |       |
|    |                                                         |             | rs1030454  | 0.17 | intron        |       |
|    |                                                         |             | rs35738    | 0.42 | intron        |       |
|    |                                                         |             | rs35735    | 0.40 | intron        |       |
|    |                                                         |             | rs35723    | 0.41 | flanking_3UTR |       |
| 13 | <b>Endothelin receptor, nonselective type (EDNRB)</b>   | NM_000115.1 | rs1924919  | 0.19 | flanking_3UTR |       |

|           |                                                          |             |            |      |               |       |
|-----------|----------------------------------------------------------|-------------|------------|------|---------------|-------|
|           |                                                          |             | rs11149080 | 0.41 | flanking_3UTR |       |
|           |                                                          |             | rs4885491  | 0.12 | 3UTR          |       |
|           |                                                          |             | rs3027095  | 0.03 | 3UTR          |       |
|           |                                                          |             | rs3818416  | 0.21 | intron        |       |
|           |                                                          |             | rs5352     | 0.01 | coding        | S304N |
|           |                                                          |             | rs5351     | 0.40 | coding        | L276L |
|           |                                                          |             | rs2147555  | 0.08 | intron        |       |
|           |                                                          |             | rs2329046  | 0.40 | intron        |       |
|           |                                                          |             | rs4885493  | 0.28 | intron        |       |
|           |                                                          |             | rs7982910  | 0.48 | intron        |       |
|           |                                                          |             | rs3759475  | 0.41 | intron        |       |
|           |                                                          |             | rs9544638  | 0.40 | intron        |       |
| <b>13</b> | <b>Solute carrier family 10, member 2 (SLC10A2)</b>      | NM_000452.1 | rs7992775  | 0.47 | flanking_3UTR |       |
|           |                                                          |             | rs6491729  | 0.27 | flanking_3UTR |       |
|           |                                                          |             | rs279941   | 0.19 | 3UTR          |       |
|           |                                                          |             | rs190716   | 0.22 | intron        |       |
|           |                                                          |             | rs1854519  | 0.28 | intron        |       |
|           |                                                          |             | rs183963   | 0.33 | intron        |       |
|           |                                                          |             | rs4772525  | 0.31 | intron        |       |
|           |                                                          |             | rs157266   | 0.18 | intron        |       |
|           |                                                          |             | rs1886927  | 0.16 | intron        |       |
|           |                                                          |             | rs3759504  | 0.24 | flanking_5UTR |       |
|           |                                                          |             | rs466802   | 0.03 | flanking_5UTR |       |
|           |                                                          |             | rs7319981  | 0.30 | flanking_5UTR |       |
| <b>14</b> | <b>Hypoxia-inducible factor 1, alpha subunit (HIF1A)</b> | NM_001530.2 | rs1951795  | 0.15 | intron        |       |
|           |                                                          |             | rs4899056  | 0.06 | intron        |       |
|           |                                                          |             | rs1957757  | 0.06 | intron        |       |
|           |                                                          |             | rs11158358 | 0.13 | intron        |       |
|           |                                                          |             | rs2301111  | 0.16 | intron        |       |
|           |                                                          |             | rs2301113  | 0.18 | intron        |       |
|           |                                                          |             | rs11549465 | 0.09 | coding        | P581S |
|           |                                                          |             | rs1319462  | 0.17 | flanking_3UTR |       |
| <b>14</b> | <b>Estrogen receptor 2 (ESR2)</b>                        | NM_001437.1 | rs1152579  | 0.38 | flanking_3UTR |       |
|           |                                                          |             | rs1256064  | 0.09 | intron        |       |
|           |                                                          |             | rs1256063  | 0.08 | intron        |       |
|           |                                                          |             | rs1256061  | 0.48 | intron        |       |
|           |                                                          |             | rs1256059  | 0.40 | intron        |       |
|           |                                                          |             | rs8017441  | 0.13 | intron        |       |
|           |                                                          |             | rs7157428  | 0.09 | intron        |       |
|           |                                                          |             | rs1256049  | 0.03 | coding        | V327V |
|           |                                                          |             | rs7154455  | 0.34 | intron        |       |
|           |                                                          |             | rs1256030  | 0.42 | intron        |       |
|           |                                                          |             | rs1952586  | 0.16 | intron        |       |
|           |                                                          |             | rs1887994  | 0.08 | intron        |       |
|           |                                                          |             | rs1271572  | 0.41 | flanking_5UTR |       |
|           |                                                          |             | rs975232   | 0.30 | flanking_3UTR |       |

|    |                                                             |                |            |      |               |        |
|----|-------------------------------------------------------------|----------------|------------|------|---------------|--------|
| 14 | <b>Solute carrier family 10, member 1 (SLC10A1)</b>         | NM_003049.1    | rs8013586  | 0.19 | flanking_3UTR |        |
|    |                                                             |                | rs9323529  | 0.01 | intron        |        |
|    |                                                             |                | rs2296651  | 0.00 | coding        | S266F  |
|    |                                                             |                | rs11624523 | 0.32 | intron        |        |
|    |                                                             |                | rs11622925 | 0.12 | intron        |        |
| 14 | <b>V-AKT murine Thymoma viral oncogene homolog 1 (AKT1)</b> | NM_001014431.1 | rs2498804  | 0.33 | flanking_3UTR |        |
|    |                                                             |                | rs2494730  | 0.33 | flanking_3UTR |        |
|    |                                                             |                | rs2498802  | 0.34 | flanking_3UTR |        |
|    |                                                             |                | rs3730358  |      | intron        |        |
|    |                                                             |                | rs2494738  | 0.11 | intron        |        |
|    |                                                             |                | rs2494746  | 0.08 | intron        |        |
|    |                                                             |                | rs1130214  | 0.28 | 5UTR          |        |
| 15 | <b>Thrombospondin-1 (THBS1)</b>                             | NM_003246.2    | rs1478604  | 0.22 | 5UTR          |        |
|    |                                                             |                | rs753599   | 0.10 | intron        |        |
|    |                                                             |                | rs2292305  | 0.10 | coding        | T522A  |
|    |                                                             |                | rs2228262  | 0.08 | coding        | N699S  |
|    |                                                             |                | rs1051442  | 0.12 | 3UTR          |        |
| 15 | <b>Dual oxidase 2 (DUOX2)</b>                               | NM_014080.3    | rs269866   | 0.36 | intron        |        |
|    | <b>Dual oxidase 1 (DUOX1)</b>                               | NM_017434.3    | rs269863   | 0.02 | intron        |        |
|    |                                                             |                | rs1961660  | 0.01 | intron        |        |
|    |                                                             |                | rs269856   | 0.03 | intron        |        |
|    |                                                             |                | rs1365242  | 0.46 | intron        |        |
|    |                                                             |                | rs1706810  | 0.27 | intron        |        |
|    |                                                             |                | rs1648282  | 0.38 | intron        |        |
|    |                                                             |                | rs2020216  | 0.11 | intron        |        |
|    |                                                             |                | rs3784577  | 0.10 | intron        |        |
|    |                                                             |                | rs1706803  | 0.16 | intron        |        |
|    |                                                             |                | rs1706804  | 0.24 | coding        | T1075T |
|    |                                                             |                | rs1706808  | 0.38 | intron        |        |
|    |                                                             |                | rs1648312  | 0.38 | 3UTR          |        |
|    |                                                             |                | rs2292467  | 0.26 | 3UTR          |        |
|    |                                                             |                | rs1706816  | 0.12 | flanking_3UTR |        |
| 15 | <b>Aromatase (CYP19A1)</b>                                  | NM_000103.2    | rs1122044  | 0.50 | flanking_3UTR |        |
|    |                                                             |                | rs2414093  | 0.17 | flanking_3UTR |        |
|    |                                                             |                | rs4775928  | 0.38 | flanking_3UTR |        |
|    |                                                             |                | rs3759809  | 0.25 | flanking_3UTR |        |
|    |                                                             |                | rs934633   | 0.08 | flanking_3UTR |        |
|    |                                                             |                | rs10046    | 0.45 | 3UTR          |        |
|    |                                                             |                | rs28757184 | 0.06 | coding        | T200M  |
|    |                                                             |                | rs2899472  | 0.27 | intron        |        |
|    |                                                             |                | rs700518   | 0.41 | coding        | V79V   |
|    |                                                             |                | rs10519295 | 0.10 | intron        |        |
|    |                                                             |                | rs727479   | 0.30 | intron        |        |
|    |                                                             |                | rs12591359 | 0.36 | intron        |        |
|    |                                                             |                | rs1062033  | 0.48 | intron        |        |
|    |                                                             |                | rs2008691  | 0.17 | intron        |        |



|           |                                                            |             |            |      |               |  |
|-----------|------------------------------------------------------------|-------------|------------|------|---------------|--|
|           |                                                            |             | rs1008805  | 0.45 | intron        |  |
|           |                                                            |             | rs749292   | 0.46 | intron        |  |
|           |                                                            |             | rs1902586  | 0.05 | intron        |  |
|           |                                                            |             | rs936306   | 0.18 | intron        |  |
|           |                                                            |             | rs2470176  | 0.18 | intron        |  |
|           |                                                            |             | rs2470152  | 0.45 | intron        |  |
|           |                                                            |             | rs2470150  | 0.08 | intron        |  |
|           |                                                            |             | rs1902584  | 0.11 | intron        |  |
|           |                                                            |             | rs1004984  | 0.42 | intron        |  |
|           |                                                            |             | rs7175922  | 0.15 | flanking_5UTR |  |
| <b>15</b> | <b>Homolog of drosophila mothers against dpp 3 (SMAD3)</b> | NM_005902.3 | rs12904944 | 0.32 | intron        |  |
|           |                                                            |             | rs10518707 | 0.48 | intron        |  |
|           |                                                            |             | rs4776881  | 0.42 | intron        |  |
|           |                                                            |             | rs12324036 | 0.42 | intron        |  |
|           |                                                            |             | rs7176870  | 0.41 | intron        |  |
|           |                                                            |             | rs9972423  | 0.42 | intron        |  |
|           |                                                            |             | rs2118612  | 0.21 | intron        |  |
|           |                                                            |             | rs1438386  | 0.32 | intron        |  |
|           |                                                            |             | rs718663   | 0.07 | intron        |  |
|           |                                                            |             | rs4776892  | 0.21 | intron        |  |
|           |                                                            |             | rs920293   | 0.06 | intron        |  |
|           |                                                            |             | rs11071937 | 0.33 | intron        |  |
|           |                                                            |             | rs4776342  | 0.23 | intron        |  |
|           |                                                            |             | rs991157   | 0.31 | intron        |  |
|           |                                                            |             | rs11071938 | 0.33 | intron        |  |
|           |                                                            |             | rs6494633  | 0.44 | intron        |  |
|           |                                                            |             | rs7178117  | 0.45 | intron        |  |
|           |                                                            |             | rs2414937  | 0.18 | intron        |  |
|           |                                                            |             | rs12443188 | 0.28 | intron        |  |
|           |                                                            |             | rs745103   | 0.38 | intron        |  |
|           |                                                            |             | rs893473   | 0.16 | intron        |  |
|           |                                                            |             | rs2289263  | 0.47 | intron        |  |
|           |                                                            |             | rs2033785  | 0.26 | intron        |  |
|           |                                                            |             | rs731874   | 0.30 | intron        |  |
|           |                                                            |             | rs12441344 | 0.23 | intron        |  |
|           |                                                            |             | rs2033784  | 0.28 | intron        |  |
|           |                                                            |             | rs7173698  | 0.33 | intron        |  |
|           |                                                            |             | rs11639295 | 0.32 | intron        |  |
|           |                                                            |             | rs7183244  | 0.40 | intron        |  |
|           |                                                            |             | rs2278545  | 0.10 | intron        |  |
|           |                                                            |             | rs1470003  | 0.47 | intron        |  |
|           |                                                            |             | rs3784681  | 0.30 | intron        |  |
|           |                                                            |             | rs6494636  | 0.49 | intron        |  |
|           |                                                            |             | rs8031440  | 0.19 | 3UTR          |  |
| <b>16</b> | <b>Protein kinase C, beta 1 (PRKCB1)</b>                   | NM_002738.5 | rs3760106  | 0.18 | flanking_5UTR |  |
|           |                                                            |             | rs2575390  | 0.20 | flanking_5UTR |  |
|           |                                                            |             | rs2188357  |      | intron        |  |

|           |                                              |             |            |      |               |       |
|-----------|----------------------------------------------|-------------|------------|------|---------------|-------|
|           |                                              |             | rs195999   | 0.38 | intron        |       |
|           |                                              |             | rs4788192  | 0.36 | intron        |       |
|           |                                              |             | rs1971276  |      | intron        |       |
|           |                                              |             | rs3729896  | 0.01 | coding        | P201P |
|           |                                              |             | rs7196765  |      | intron        |       |
|           |                                              |             | rs1013316  | 0.41 | intron        |       |
|           |                                              |             | rs429342   | 0.21 | intron        |       |
|           |                                              |             | rs3729904  |      | coding        | G589G |
|           |                                              |             | rs3785380  | 0.02 | 3UTR          |       |
| <b>16</b> | <b>Matrix metalloproteinase 2 (MMP2)</b>     | NM_004530.2 | rs243866   | 0.24 | flanking_5UTR |       |
|           |                                              |             | rs243865   | 0.18 | flanking_5UTR |       |
|           |                                              |             | rs857403   | 0.13 | intron        |       |
|           |                                              |             | rs1132896  | 0.43 | coding        | G225G |
|           |                                              |             | rs1053605  | 0.08 | coding        | T249T |
|           |                                              |             | rs243842   | 0.36 | intron        |       |
|           |                                              |             | rs243839   | 0.14 | intron        |       |
|           |                                              |             | rs2287076  | 0.49 | intron        |       |
|           |                                              |             | rs243836   | 0.48 | intron        |       |
|           |                                              |             | rs243834   | 0.46 | intron        |       |
|           |                                              |             | rs17302903 | 0.50 | 5UTR          |       |
| <b>17</b> | <b>Sex hormone binding globulin (SHBG)</b>   | NM_001040.2 | rs13894    | 0.10 | coding        | R125C |
|           |                                              |             | rs858521   | 0.39 | intron        |       |
|           |                                              |             | rs6258     | 0.02 | coding        | P184L |
|           |                                              |             | rs6259     | 0.14 | coding        | D355N |
|           |                                              |             | rs2955617  | 0.38 | flanking_3UTR |       |
|           |                                              |             | rs1641544  | 0.07 | flanking_3UTR |       |
| <b>17</b> | <b>Nitric oxide synthase 2 (NOS2A)</b>       | NM_000625.3 | rs4795051  | 0.49 | flanking_3UTR |       |
|           |                                              |             | rs7406657  | 0.19 | flanking_3UTR |       |
|           |                                              |             | rs8068149  | 0.35 | intron        |       |
|           |                                              |             | rs2314809  | 0.47 | intron        |       |
|           |                                              |             | rs2297516  | 0.34 | intron        |       |
|           |                                              |             | rs2297517  | 0.00 | intron        |       |
|           |                                              |             | rs2248814  | 0.48 | intron        |       |
|           |                                              |             | rs4796052  | 0.17 | intron        |       |
|           |                                              |             | rs1137933  | 0.20 | coding        | D384D |
|           |                                              |             | rs4795067  | 0.30 | intron        |       |
|           |                                              |             | rs1113283  | 0.22 | intron        |       |
|           |                                              |             | rs3729508  | 0.49 | intron        |       |
|           |                                              |             | rs944725   | 0.39 | intron        |       |
|           |                                              |             | rs3794764  | 0.18 | intron        |       |
|           |                                              |             | rs11080358 | 0.08 | flanking_5UTR |       |
| <b>17</b> | <b>Retinoic acid receptor, alpha (RARA)</b>  | NM_000964.2 | rs2715554  | 0.16 | intron        |       |
|           |                                              |             | rs2715553  | 0.46 | intron        |       |
|           |                                              |             | rs9303285  | 0.17 | intron        |       |
|           |                                              |             | rs482284   | 0.28 | intron        |       |
| <b>17</b> | <b>Angiotensin I converting enzyme (ACE)</b> | NM_152830.1 | rs4305     | 0.40 | intron        |       |

|           |                                        |             |            |      |               |        |
|-----------|----------------------------------------|-------------|------------|------|---------------|--------|
|           |                                        |             | rs4309     | 0.46 | coding        | P404P  |
|           |                                        |             | rs4311     | 0.38 | intron        |        |
|           |                                        |             | rs4329     | 0.48 | intron        |        |
|           |                                        |             | rs4343     | 0.48 | coding        | T775T  |
|           |                                        |             | rs4344     | 0.49 | intron        |        |
|           |                                        |             | rs4353     | 0.48 | intron        |        |
|           |                                        |             | rs4362     | 0.49 | coding        | F1128F |
|           |                                        |             | rs4363     | 0.50 | intron        |        |
|           |                                        |             | rs4461142  | 0.48 | intron        |        |
|           |                                        |             | rs4267385  | 0.42 | intron        |        |
|           |                                        |             | rs4459610  | 0.42 | coding        | K714N  |
|           |                                        |             | rs8066276  | 0.38 | intron        |        |
|           |                                        |             | rs12451328 | 0.39 | intron        |        |
|           |                                        |             | rs4968591  | 0.42 | intron        |        |
| <b>17</b> | <b>Protein kinase C, alpha (PRKCA)</b> | NM_002737.2 | rs6504413  | 0.05 | intron        |        |
|           |                                        |             | rs4328478  | 0.44 | intron        |        |
|           |                                        |             | rs12450534 | 0.23 | intron        |        |
|           |                                        |             | rs8078231  | 0.27 | intron        |        |
|           |                                        |             | rs4435295  | 0.07 | intron        |        |
|           |                                        |             | rs4561502  | 0.28 | intron        |        |
|           |                                        |             | rs4417581  | 0.09 | intron        |        |
|           |                                        |             | rs4790911  | 0.08 | intron        |        |
|           |                                        |             | rs16959227 | 0.11 | intron        |        |
|           |                                        |             | rs11079656 | 0.28 | intron        |        |
|           |                                        |             | rs973753   | 0.15 | intron        |        |
|           |                                        |             | rs7405806  | 0.25 | intron        |        |
|           |                                        |             | rs11079657 | 0.18 | intron        |        |
|           |                                        |             | rs990082   | 0.32 | intron        |        |
|           |                                        |             | rs228885   | 0.26 | intron        |        |
|           |                                        |             | rs11654093 | 0.33 | intron        |        |
|           |                                        |             | rs8074294  | 0.35 | intron        |        |
|           |                                        |             | rs7211424  | 0.44 | intron        |        |
|           |                                        |             | rs956952   | 0.17 | intron        |        |
|           |                                        |             | rs1806448  | 0.26 | intron        |        |
|           |                                        |             | rs1003598  | 0.48 | intron        |        |
|           |                                        |             | rs2078153  | 0.24 | intron        |        |
|           |                                        |             | rs1860984  | 0.08 | intron        |        |
|           |                                        |             | rs887797   | 0.40 | intron        |        |
|           |                                        |             | rs10491204 | 0.14 | intron        |        |
|           |                                        |             | rs1985633  | 0.39 | intron        |        |
|           |                                        |             | rs1860985  | 0.11 | intron        |        |
|           |                                        |             | rs8068966  | 0.38 | intron        |        |
|           |                                        |             | rs11867695 | 0.48 | intron        |        |
|           |                                        |             | rs8071795  | 0.10 | intron        |        |
|           |                                        |             | rs17710992 | 0.28 | intron        |        |
|           |                                        |             | rs3889237  | 0.36 | intron        |        |
|           |                                        |             | rs8464     | 0.15 | 3UTR          |        |
| <b>18</b> | <b>Homolog of drosophila mothers</b>   | NM_005901.4 | rs1792666  | 0.48 | flanking_3UTR |        |

|           |                                                            |             |            |      |               |       |
|-----------|------------------------------------------------------------|-------------|------------|------|---------------|-------|
|           | <b>against dpp 2 (SMAD2)</b>                               |             |            |      |               |       |
|           |                                                            |             | rs8085335  | 0.08 | flanking_3UTR |       |
|           |                                                            |             | rs1792684  | 0.48 | intron        |       |
|           |                                                            |             | rs9946556  | 0.45 | intron        |       |
|           |                                                            |             | rs1792658  | 0.22 | intron        |       |
|           |                                                            |             | rs1792683  | 0.43 | intron        |       |
|           |                                                            |             | rs1787177  | 0.08 | intron        |       |
|           |                                                            |             | rs1631576  | 0.47 | intron        |       |
|           |                                                            |             | rs11082639 | 0.48 | intron        |       |
|           |                                                            |             | rs4940086  | 0.34 | intron        |       |
| <b>18</b> | <b>Homolog of drosophila mothers against dpp 4 (SMAD4)</b> | NM_005359.3 | rs12958604 | 0.42 | intron        |       |
|           |                                                            |             | rs12968012 | 0.40 | intron        |       |
|           |                                                            |             | rs10502913 | 0.27 | intron        |       |
|           |                                                            |             | rs3764465  | 0.42 | intron        |       |
|           |                                                            |             | rs948588   | 0.09 | intron        |       |
| <b>19</b> | <b>Elastase 2 (ELA2)</b>                                   | NM_001972.2 | rs3761008  | 0.11 | flanking_3UTR |       |
|           |                                                            |             | rs3826946  | 0.14 | flanking_3UTR |       |
|           |                                                            |             | rs7260160  |      | flanking_5UTR |       |
|           |                                                            |             | rs1683564  | 0.38 | flanking_5UTR |       |
| <b>19</b> | <b>Transforming growth factor, Beta-1 (TGFB1)</b>          | NM_000660.3 | rs1800472  | 0.02 | coding        | T262I |
|           |                                                            |             | rs4803455  | 0.48 | intron        |       |
|           |                                                            |             | rs2241715  | 0.30 | intron        |       |
|           |                                                            |             | rs1800469  | 0.31 | flanking_3UTR |       |
|           |                                                            |             | rs1982072  | 0.31 | intron        |       |
| <b>19</b> | <b>Apolipoprotein E (APOE)</b>                             | NM_000041.2 | rs405509   | 0.50 | flanking_5UTR |       |
|           |                                                            |             | rs429358   |      | coding        | C129R |
|           |                                                            |             | rs7412     | 0.28 | coding        | R175C |
|           |                                                            |             | rs439401   | 0.38 | flanking_3UTR |       |
| <b>19</b> | <b>BCL2-associated X protein (BAX)</b>                     | NM_138764.2 | rs11667200 | 0.12 | flanking_5UTR |       |
|           |                                                            |             | rs11667229 | 0.48 | flanking_5UTR |       |
|           |                                                            |             | rs11667351 | 0.14 | flanking_5UTR |       |
|           |                                                            |             | rs1009316  | 0.12 | intron        |       |
|           |                                                            |             | rs1805419  | 0.24 | intron        |       |
|           |                                                            |             | rs4645900  | 0.05 | 3UTR          |       |
| <b>19</b> | <b>Protein kinase C, gamma (PRKCG)</b>                     | NM_002739.3 | rs307941   | 0.09 | flanking_5UTR |       |
|           |                                                            |             | rs454006   | 0.25 | intron        |       |
|           |                                                            |             | rs3745406  | 0.35 | coding        | N188N |
|           |                                                            |             | rs3745405  | 0.34 | intron        |       |
|           |                                                            |             | rs3844454  | 0.08 | flanking_5UTR |       |
| <b>20</b> | <b>Thrombomodulin (THBD)</b>                               | NM_000361.2 | rs6076013  | 0.40 | flanking_3UTR |       |
|           |                                                            |             | rs3176123  | 0.18 | 3UTR          |       |
|           |                                                            |             | rs6048519  | 0.40 | flanking_5UTR |       |
|           |                                                            |             | rs8123616  | 0.24 | flanking_5UTR |       |
| <b>20</b> | <b>Lipopolysaccharide binding protein (LBP)</b>            | NM_004139.2 | rs1780616  | 0.35 | flanking_5UTR |       |
|           |                                                            |             | rs2232571  | 0.11 | flanking_5UTR |       |

|           |                                                    |             |            |      |               |       |
|-----------|----------------------------------------------------|-------------|------------|------|---------------|-------|
|           |                                                    |             | rs12624843 | 0.40 | intron        |       |
|           |                                                    |             | rs1780623  | 0.37 | intron        |       |
|           |                                                    |             | rs1780627  | 0.47 | intron        |       |
|           |                                                    |             | rs1780629  | 0.26 | flanking_3UTR |       |
|           |                                                    |             | rs737090   | 0.48 | flanking_3UTR |       |
| <b>20</b> | <b>Proteinase inhibitor 3; elafin (PI3)</b>        | NM_002638.2 | rs1983649  | 0.38 | intron        |       |
|           |                                                    |             | rs6032040  | 0.14 | intron        |       |
|           |                                                    |             | rs2664581  | 0.14 | coding        | T33P  |
|           |                                                    |             | rs2267864  | 0.16 | flanking_3UTR |       |
| <b>20</b> | <b>Matrix metalloproteinase 9 (MMP9)</b>           | NM_004994.2 | rs4810482  | 0.38 | flanking_5UTR |       |
|           |                                                    |             | rs3918241  | 0.19 | flanking_5UTR |       |
|           |                                                    |             | rs1805088  | 0.03 | coding        | A19V  |
|           |                                                    |             | rs2250889  | 0.05 | coding        | R573P |
|           |                                                    |             | rs3918261  | 0.23 | intron        |       |
|           |                                                    |             | rs3918270  | 0.19 | flanking_3UTR |       |
| <b>20</b> | <b>Prostaglandin I2 synthase (PTGIS)</b>           | NM_000961.3 | rs491025   | 0.46 | flanking_3UTR |       |
|           |                                                    |             | rs5602     | 0.46 | 3UTR          |       |
|           |                                                    |             | rs729824   | 0.25 | intron        |       |
|           |                                                    |             | rs7271624  | 0.26 | intron        |       |
|           |                                                    |             | rs6090996  | 0.17 | intron        |       |
|           |                                                    |             | rs508757   | 0.13 | intron        |       |
|           |                                                    |             | rs6091000  | 0.03 | intron        |       |
|           |                                                    |             | rs570022   | 0.13 | intron        |       |
|           |                                                    |             | rs491490   | 0.29 | intron        |       |
|           |                                                    |             | rs927068   | 0.26 | intron        |       |
|           |                                                    |             | rs477627   | 0.13 | intron        |       |
|           |                                                    |             | rs693649   | 0.16 | flanking_5UTR |       |
|           |                                                    |             | rs6019910  | 0.07 | flanking_5UTR |       |
| <b>21</b> | <b>Superoxide dismutase 1, soluble (SOD1)</b>      | NM_000454.4 | rs10432782 | 0.12 | intron        |       |
|           |                                                    |             | rs2070424  | 0.09 | intron        |       |
|           |                                                    |             | rs1041740  | 0.23 | intron        |       |
| <b>21</b> | <b>Runt-related transcription factor 1 (RUNX1)</b> | NM_001754.3 | rs2070369  | 0.49 | flanking_3UTR |       |
|           |                                                    |             | rs2070370  | 0.45 | flanking_3UTR |       |
|           |                                                    |             | rs2073354  | 0.08 | intron        |       |
|           |                                                    |             | rs2249650  | 0.44 | intron        |       |
|           |                                                    |             | rs2249884  | 0.33 | intron        |       |
|           |                                                    |             | rs2834642  | 0.46 | intron        |       |
|           |                                                    |             | rs2253319  | 0.31 | intron        |       |
|           |                                                    |             | rs2834646  | 0.07 | intron        |       |
|           |                                                    |             | rs2834647  | 0.05 | intron        |       |
|           |                                                    |             | rs2243988  | 0.33 | intron        |       |
|           |                                                    |             | rs2226303  | 0.20 | intron        |       |
|           |                                                    |             | rs2834650  | 0.16 | intron        |       |
|           |                                                    |             | rs2284612  | 0.36 | intron        |       |
|           |                                                    |             | rs2268281  | 0.12 | intron        |       |
|           |                                                    |             | rs2284613  | 0.29 | intron        |       |

|           |                                          |             |            |      |               |  |
|-----------|------------------------------------------|-------------|------------|------|---------------|--|
|           |                                          |             | rs2268284  | 0.09 | intron        |  |
|           |                                          |             | rs8134380  | 0.46 | intron        |  |
|           |                                          |             | rs968625   | 0.22 | intron        |  |
|           |                                          |             | rs2834651  | 0.36 | intron        |  |
|           |                                          |             | rs2248720  | 0.48 | intron        |  |
|           |                                          |             | rs2834654  | 0.22 | intron        |  |
|           |                                          |             | rs2268290  | 0.14 | intron        |  |
|           |                                          |             | rs2252585  | 0.30 | intron        |  |
|           |                                          |             | rs2284617  | 0.20 | intron        |  |
|           |                                          |             | rs2834656  | 0.20 | intron        |  |
|           |                                          |             | rs2300396  | 0.22 | intron        |  |
|           |                                          |             | rs2300400  | 0.18 | intron        |  |
|           |                                          |             | rs13053063 | 0.14 | intron        |  |
|           |                                          |             | rs2300401  | 0.32 | intron        |  |
|           |                                          |             | rs2834662  | 0.25 | intron        |  |
|           |                                          |             | rs2834664  | 0.13 | intron        |  |
|           |                                          |             | rs1475840  | 0.48 | intron        |  |
|           |                                          |             | rs2834675  | 0.09 | intron        |  |
|           |                                          |             | rs2834676  | 0.46 | intron        |  |
|           |                                          |             | rs4817699  | 0.09 | intron        |  |
|           |                                          |             | rs2834680  | 0.05 | intron        |  |
|           |                                          |             | rs2834683  | 0.45 | intron        |  |
|           |                                          |             | rs2834684  | 0.31 | intron        |  |
|           |                                          |             | rs2051179  | 0.49 | intron        |  |
|           |                                          |             | rs2834703  | 0.36 | intron        |  |
|           |                                          |             | rs2834708  | 0.39 | intron        |  |
|           |                                          |             | rs2834709  | 0.41 | intron        |  |
|           |                                          |             | rs1981392  | 0.37 | intron        |  |
|           |                                          |             | rs2834714  | 0.36 | intron        |  |
|           |                                          |             | rs762248   | 0.10 | intron        |  |
|           |                                          |             | rs8130985  | 0.10 | intron        |  |
|           |                                          |             | rs2834726  | 0.07 | intron        |  |
|           |                                          |             | rs2834729  | 0.14 | intron        |  |
|           |                                          |             | rs2834732  | 0.43 | intron        |  |
|           |                                          |             | rs2834735  | 0.38 | intron        |  |
|           |                                          |             | rs2834736  | 0.36 | intron        |  |
|           |                                          |             | rs2242890  | 0.35 | intron        |  |
|           |                                          |             | rs2294163  | 0.16 | intron        |  |
|           |                                          |             | rs2834739  | 0.36 | intron        |  |
|           |                                          |             | rs1883066  | 0.15 | intron        |  |
|           |                                          |             | rs7280028  | 0.16 | intron        |  |
|           |                                          |             | rs7277157  | 0.24 | intron        |  |
|           |                                          |             | rs2834740  | 0.36 | flanking_5UTR |  |
| <b>21</b> | <b>Cystathionine-beta-synthase (CBS)</b> | NM_000071.1 | rs719037   | 0.45 | flanking_3UTR |  |
|           |                                          |             | rs12613    | 0.09 | 3UTR          |  |
|           |                                          |             | rs4920037  | 0.22 | intron        |  |
|           |                                          |             | rs234705   | 0.34 | intron        |  |
|           |                                          |             | rs9982015  | 0.09 | intron        |  |

|           |                                                                  |             |            |      |               |       |
|-----------|------------------------------------------------------------------|-------------|------------|------|---------------|-------|
|           |                                                                  |             | rs11701048 | 0.09 | intron        |       |
| <b>21</b> | <b>Collagen, type XVIII, alpha-1 (COL18A1)</b>                   | NM_130445.2 | rs2838665  | 0.33 | flanking_5UTR |       |
|           |                                                                  |             | rs2183589  | 0.13 | flanking_5UTR |       |
|           |                                                                  |             | rs2838906  | 0.32 | flanking_5UTR |       |
|           |                                                                  |             | rs879330   | 0.06 | flanking_3UTR |       |
|           |                                                                  |             | rs2838907  | 0.36 | flanking_3UTR |       |
|           |                                                                  |             | rs4819099  | 0.21 | flanking_3UTR |       |
|           |                                                                  |             | rs4819101  | 0.29 | flanking_3UTR |       |
|           |                                                                  |             | rs2838917  | 0.25 | 3UTR          |       |
|           |                                                                  |             | rs2838920  | 0.11 | coding        |       |
|           |                                                                  |             | rs7281421  | 0.31 | flanking_5UTR |       |
|           |                                                                  |             | rs2838923  | 0.32 | flanking_5UTR |       |
|           |                                                                  |             | rs8126757  | 0.15 | flanking_5UTR |       |
|           |                                                                  |             | rs8129539  | 0.12 | flanking_5UTR |       |
|           |                                                                  |             | rs9985044  | 0.31 | flanking_5UTR |       |
|           |                                                                  |             | rs11089003 | 0.20 | flanking_5UTR |       |
|           |                                                                  |             | rs2015673  | 0.09 | flanking_5UTR |       |
|           |                                                                  |             | rs10854470 | 0.36 | flanking_5UTR |       |
|           |                                                                  |             | rs2838933  | 0.12 | intron        |       |
|           |                                                                  |             | rs2236470  | 0.21 | intron        |       |
|           |                                                                  |             | rs1556329  | 0.09 | intron        |       |
|           |                                                                  |             | rs2236475  | 0.20 | intron        |       |
|           |                                                                  |             | rs2236479  | 0.31 | intron        |       |
|           |                                                                  |             | rs7409857  | 0.45 | intron        |       |
|           |                                                                  |             | rs3753019  | 0.37 | intron        |       |
|           |                                                                  |             | rs2236483  | 0.38 | intron        |       |
|           |                                                                  |             | rs2838950  | 0.25 | intron        |       |
|           |                                                                  |             | rs7278425  | 0.14 | intron        |       |
|           |                                                                  |             | rs1050351  | 0.42 | coding        |       |
|           |                                                                  |             | rs2838951  | 0.47 | intron        |       |
| <b>22</b> | <b>Heme oxygenase 1 (HMOX1)</b>                                  | NM_002133.1 | rs12168789 | 0.00 | flanking_5UTR |       |
|           |                                                                  |             | rs2071746  | 0.46 | flanking_5UTR |       |
|           |                                                                  |             | rs2071748  | 0.38 | intron        |       |
|           |                                                                  |             | rs2071749  | 0.49 | intron        |       |
|           |                                                                  |             | rs11912889 | 0.07 | intron        |       |
|           |                                                                  |             | rs5755720  | 0.30 | intron        |       |
|           |                                                                  |             | rs2285112  | 0.39 | intron        |       |
|           |                                                                  |             | rs743811   | 0.25 | flanking_3UTR |       |
| <b>22</b> | <b>Peroxisome proliferator activated receptor, alpha (PPARA)</b> | NM_005036.4 | rs9627100  | 0.09 | intron        |       |
|           |                                                                  |             | rs4253701  | 0.11 | intron        |       |
|           |                                                                  |             | rs11703495 | 0.14 | intron        |       |
|           |                                                                  |             | rs4253711  | 0.27 | intron        |       |
|           |                                                                  |             | rs4823613  | 0.30 | intron        |       |
|           |                                                                  |             | rs1800206  | 0.04 | coding        | L161V |
|           |                                                                  |             | rs4253755  | 0.18 | intron        |       |
|           |                                                                  |             | rs4253760  | 0.21 | intron        |       |
|           |                                                                  |             | rs11090819 | 0.06 | intron        |       |

|          |                                                       |             |            |      |               |       |
|----------|-------------------------------------------------------|-------------|------------|------|---------------|-------|
|          |                                                       |             | kr1800234  | na   | intron        |       |
| <b>X</b> | <b>Cytochrome b-245, NADPH Oxidase 2, NOX2 (CYBB)</b> | NM_000397.2 | rs6610650  | 0.13 | flanking_5UTR |       |
|          |                                                       |             | rs6520785  | 0.13 | intron        |       |
|          |                                                       |             | rs4827298  | 0.22 | intron        |       |
|          |                                                       |             | rs5964125  | 0.11 | intron        |       |
|          |                                                       |             | rs12848910 | 0.12 | intron        |       |
|          |                                                       |             | rs5964149  | 0.11 | intron        |       |
| <b>X</b> | <b>NADPH Oxidase 1 (NOX1)</b>                         | NM_007052.3 | rs4828067  | 0.37 | intron        |       |
|          |                                                       |             | rs4828068  | 0.39 | intron        |       |
|          |                                                       |             | rs5921678  | 0.40 | intron        |       |
|          |                                                       |             | rs2266916  | 0.40 | intron        |       |
|          |                                                       |             | rs4827881  | 0.24 | flanking_5UTR |       |
|          |                                                       |             | rs6620949  | 0.42 | flanking_5UTR |       |
|          |                                                       |             | rs1883411  | 0.38 | intron        |       |
| <b>X</b> | <b>Thromboplastin (HEMB)</b>                          | NM_000133.2 | rs411017   | 0.27 | flanking_5UTR |       |
|          |                                                       |             | rs371000   | 0.48 | intron        |       |
|          |                                                       |             | rs4149674  | 0.37 | intron        |       |
|          |                                                       |             | rs4149676  | 0.01 | intron        |       |
|          |                                                       |             | rs376165   | 0.38 | intron        |       |
|          |                                                       |             | rs422187   | 0.33 | intron        |       |
|          |                                                       |             | rs6048     | 0.33 | coding        | T193A |
|          |                                                       |             | rs413957   | 0.18 | intron        |       |
|          |                                                       |             | rs4149762  | 0.12 | intron        |       |
|          |                                                       |             | rs434144   | 0.20 | flanking_3UTR |       |
|          |                                                       |             | rs3117074  | 0.18 | flanking_3UTR |       |



**Table E2. Pairwise linkage disequilibrium in candidate genes.**

| Gene           | SNP 1      | SNP 2      | D'   | 95%CI       | LOD   | r <sup>2</sup> | Base pairs between SNPs |
|----------------|------------|------------|------|-------------|-------|----------------|-------------------------|
| <b>ESR1</b>    | rs2234693  | rs1913474  | 0.07 | 0 – 0.4     | 0.03  | 0.001          | 45387                   |
|                | rs1913474  | rs1801132  | 0.85 | 0.75 – 0.91 | 25.69 | 0.67           | 56800                   |
|                | rs1801132  | rs3020317  | 0.75 | 0.64 – 0.83 | 17.63 | 0.53           | 13219                   |
|                | rs3020317  | rs985694   | 0.71 | 0.57 – 0.81 | 12.54 | 0.42           | 7884                    |
|                | rs985694   | rs932477   | 0.97 | 0.85 - 1    | 20.24 | 0.61           | 17971                   |
|                | rs932477   | rs7757956  | 0.18 | 0.02 – 0.73 | 0.04  | 0.001          | 12544                   |
|                | rs7757956  | rs3020411  | 0.96 | 0.8 – 0.99  | 12.66 | 0.31           | 26623                   |
|                | rs7757956  | rs3020368  | 0.89 | 0.76 – 0.96 | 18.24 | 0.58           | 54050                   |
| <b>PDE5A</b>   | rs3775843  | rs1155576  | 1    | 0.95 - 1    | 45.82 | 0.95           | 22315                   |
|                | rs1155576  | rs10034450 | 1    | 0.95 - 1    | 45.82 | 0.95           | 5490                    |
|                | rs10034450 | rs11731756 | 1    | 0.97 - 1    | 51    | 1              | 23047                   |
| <b>ANGPT1</b>  | rs4324901  | rs4268102  | 0.42 | 0.08 – 0.69 | 0.77  | 0.03           | 106611                  |
| <b>RARB</b>    | rs871963   | rs1153584  | 0.37 | 0.21 - 0.5  | 3.44  | 0.11           | 31350                   |
| <b>CYP19A1</b> | rs1902584  | rs7175922  | 1    | 0.8 - 1     | 10.84 | 0.35           | 35083                   |
| <b>SMAD3</b>   | rs4776881  | rs12324036 | 1    | 0.97 - 1    | 59.57 | 1              | 1490                    |
| <b>S100A4</b>  | rs1810765  | rs743687   | 1    | 0.88 - 1    | 21.84 | 0.71           | 405                     |

Abbreviations: LOD, Log of the likelihood of the odds ratio; ESR1, estrogen receptor 1; PDE5A, phosphodiesterase 5; ANGPT1, angiotensinogen converting enzyme 1; RARB, retinoic acid receptor beta; CYP19A1, aromatase; S100A4, calcium-binding protein A4.

**Table E3. Logistic regression models for SNPs and the risk of PPHTN (unadjusted and adjusted for liver disease etiology)**

| Gene   | SNP       | Liver Disease                  | Unadjusted |             |         |         | Adjusted for liver disease |              |         |         |
|--------|-----------|--------------------------------|------------|-------------|---------|---------|----------------------------|--------------|---------|---------|
|        |           |                                | OR         | 95%CI       | P value | $\beta$ | OR                         | 95%CI        | P value | $\beta$ |
| ESR1   | rs1801132 | Primary sclerosing cholangitis | 2.57       | 1.14 – 5.83 | 0.02    | 0.94    | 2.81                       | 1.22 – 6.48  | 0.02    | 1.03    |
|        | rs985694  | Hepatitis C infection          | 2.52       | 1.03 – 6.15 | 0.04    | 0.92    | 3.26                       | 1.25 – 8.54  | 0.02    | 1.18    |
|        | rs985694  | Autoimmune                     | 2.52       | 1.03 – 6.15 | 0.04    | 0.92    | 5.34                       | 1.54 – 18.53 | 0.01    | 1.68    |
|        | rs932477  | Hepatitis B infection          | 3.11       | 1.02 – 9.49 | 0.05    | 1.13    | 3.08                       | 1 – 9.44     | 0.05    | 1.12    |
|        | rs7757956 | Cryptogenic                    | 0.55       | 0.26 - 1.13 | 0.10    | -0.60   | 0.51                       | 0.24 – 1.09  | 0.08    | -0.68   |
|        | rs3020368 | Primary sclerosing cholangitis | 0.53       | 0.24 – 1.16 | 0.11    | -0.64   | 0.47                       | 0.21 – 1.06  | 0.07    | -0.75   |
| S100A4 | rs1810765 | Hepatitis B infection          | 1.88       | 0.9 – 3.92  | 0.09    | 0.63    | 2.06                       | 0.96 – 4.41  | 0.06    | 0.72    |
|        | rs743687  | Hepatitis B infection          | 2.83       | 1.21 – 6.63 | 0.02    | 1.04    | 3.29                       | 1.34 – 8.09  | 0.01    | 1.19    |
| RARB   | rs1153584 | Hepatitis B infection          | 1.79       | 0.97 - 3.32 | 0.07    | 0.58    | 1.79                       | 0.96 - 3.34  | 0.07    | 0.58    |

Abbreviations: ESR1, estrogen receptor 1; S100A4, calcium-binding protein A4; RARB, retinoic acid receptor beta; OR, odds ratio

Figure E1

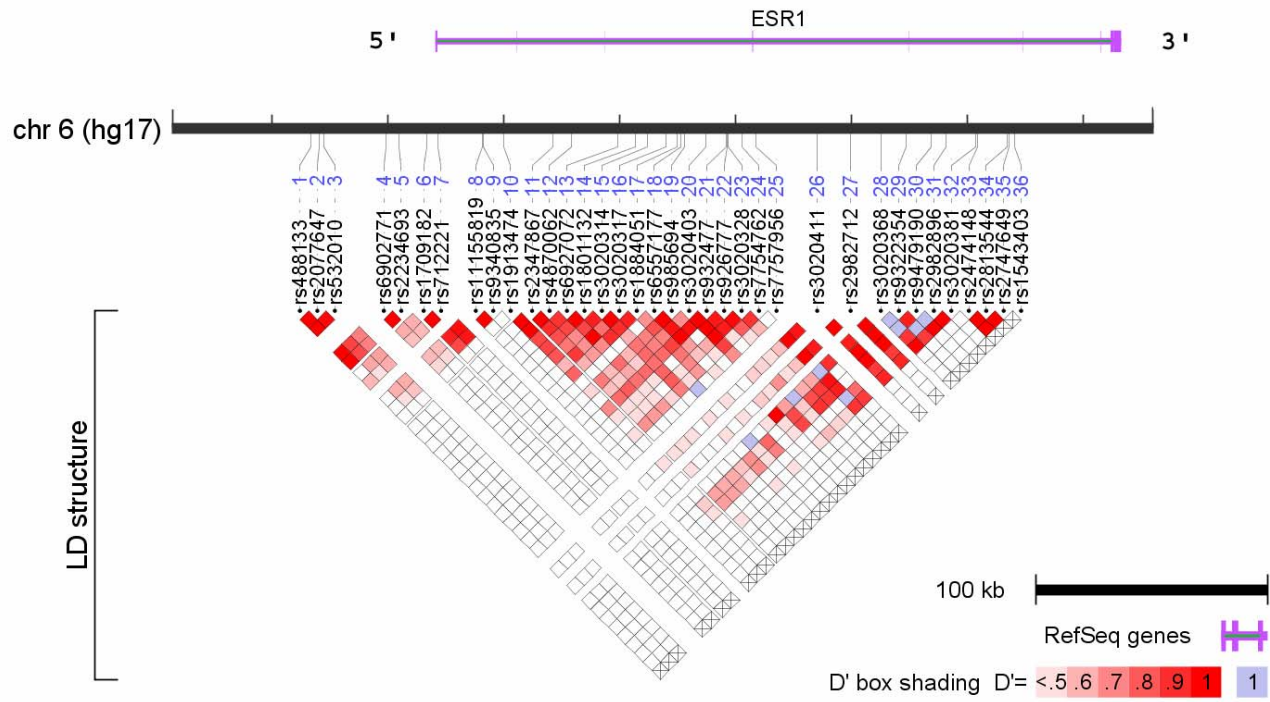

Figure E2

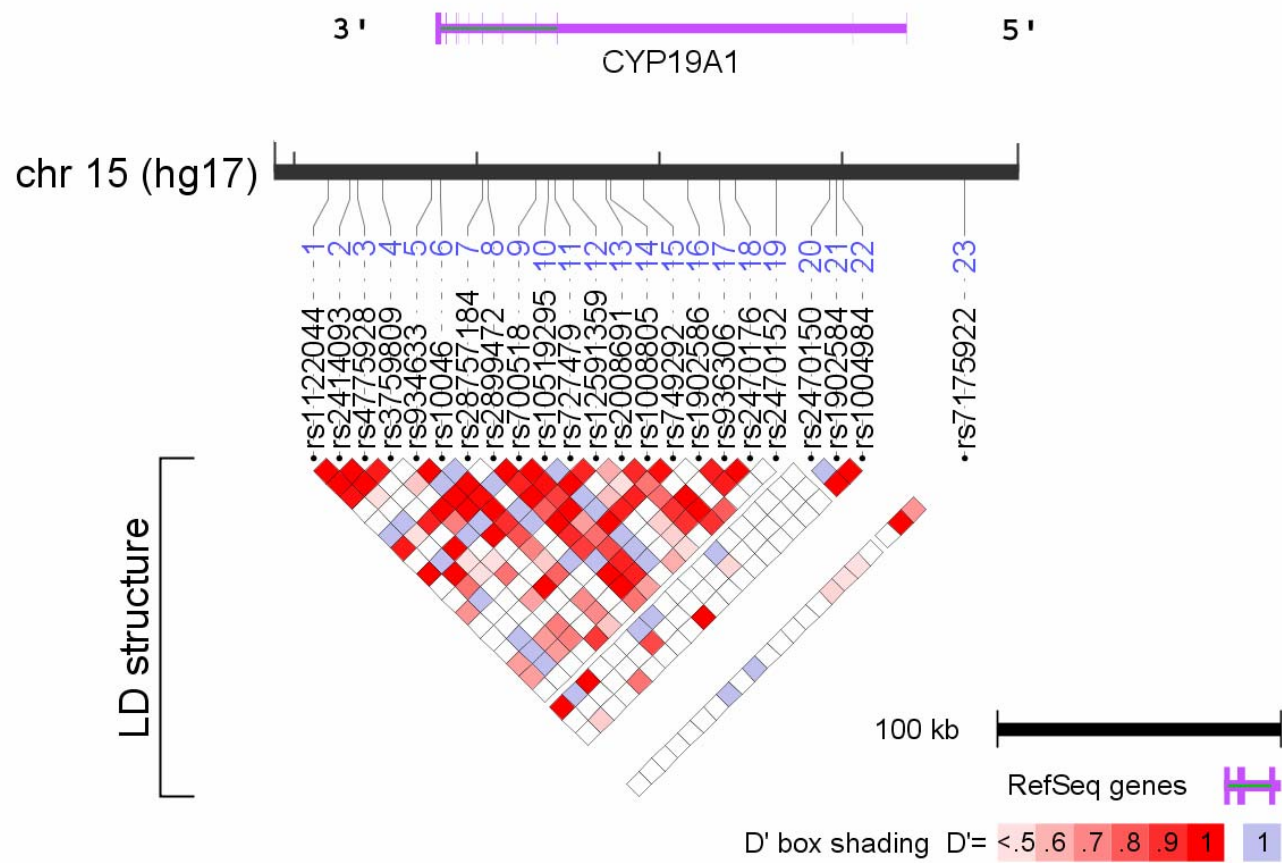

Figure E3

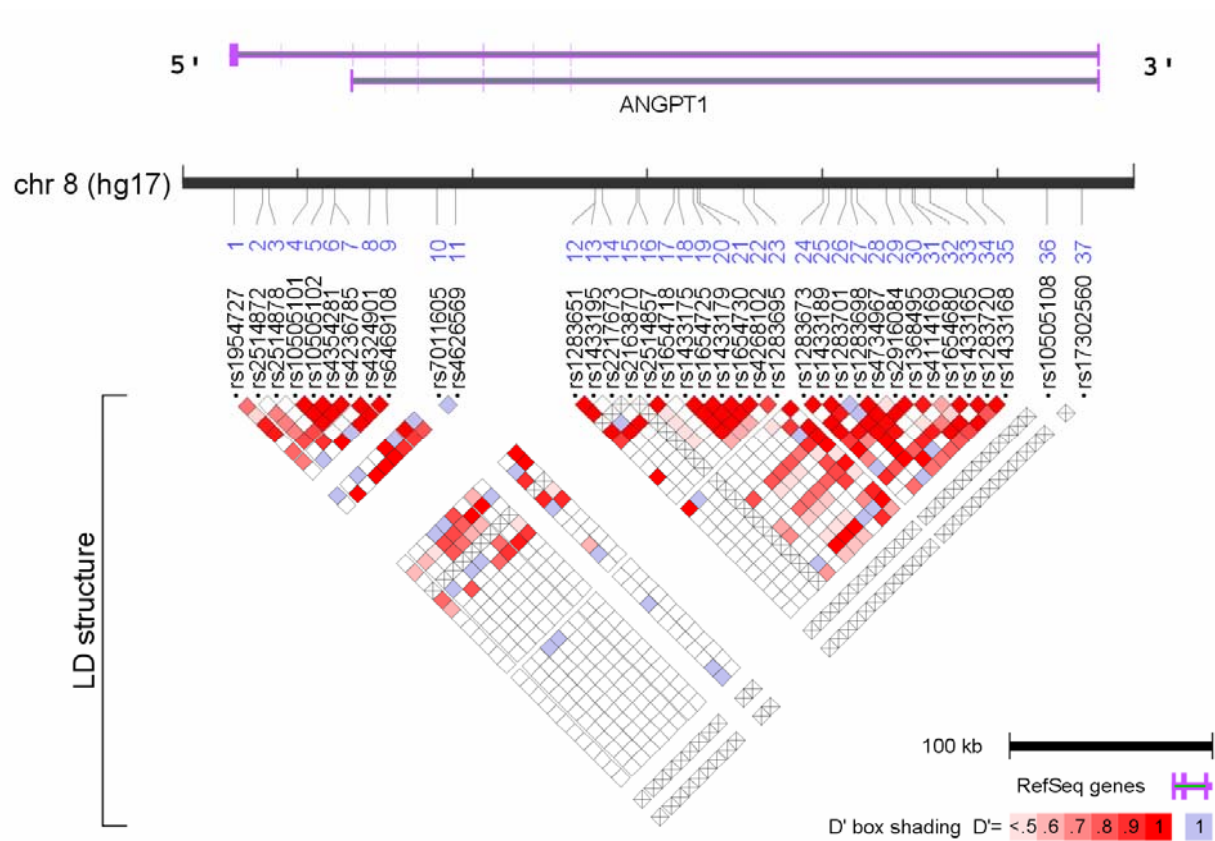

## References for Online Data Supplement

- E1. Hankinson JL, Odencrantz JR, and Fedan KB. Spirometric reference values from a sample of the general U.S. population. *Am J Respir Crit Care Med* 1999; 159:179-87.
- E2. Crapo RO, Morris AH, Clayton PD, and Nixon CR. Lung volumes in healthy nonsmoking adults. *Bull Eur Physiopathol Respir* 1982; 18:419-25.
- E3. Kamath PS, Wiesner RH, Malinchoc M, Kremers W, Therneau TM, Kosberg CL, D'Amico G, Dickson ER, and Kim WR. A model to predict survival in patients with end-stage liver disease. *Hepatology* 2001; 33:464-70.
- E4. Ashburner M, Ball CA, Blake JA, Botstein D, Butler H, Cherry JM, Davis AP, Dolinski K, Dwight SS, Eppig JT, Harris MA, Hill DP, Issel-Tarver L, Kasarskis A, Lewis S, Matese JC, Richardson JE, Ringwald M, Rubin GM, and Sherlock G. Gene ontology: tool for the unification of biology. The Gene Ontology Consortium. *Nat Genet* 2000; 25:25-9.
- E5. Seldin MF, Shigeta R, Villoslada P, Selmi C, Tuomilehto J, Silva G, Belmont JW, Klareskog L, and Gregersen PK. European population substructure: clustering of northern and southern populations. *PLoS Genet* 2006; 2:e143.
- E6. Kawut SM, Krowka MJ, Trotter JF, Roberts KE, Benza RL, Badesch DB, Taichman DB, Horn EM, Zacks S, Kaplowitz N, Brown RS, Jr., and Fallon MB. Clinical risk factors for portopulmonary hypertension. *Hepatology* 2008; 48:196-203.
- E7. Barrett JC, Fry B, Maller J, and Daly MJ. Haploview: analysis and visualization of LD and haplotype maps. *Bioinformatics* 2005; 21:263-5.
- E8. Pritchard JK, and Rosenberg NA. Use of unlinked genetic markers to detect population stratification in association studies. *Am J Hum Genet* 1999; 65:220-8.

- E9. Pritchard JK, Stephens M, Rosenberg NA, and Donnelly P. Association mapping in structured populations. *Am J Hum Genet* 2000; 67:170-81.
- E10. Gauderman W, and Morrison J. 2006. QUANTO 1.1: A computer program for power and sample size calculations for genetic-epidemiology studies, <http://hydra.usc.edu/gxe>.
- E11. Zheng G, Joo J, Zhang C, and Geller NL. Testing association for markers on the X chromosome. *Genet Epidemiol* 2007; 31:834-43.
- E12. Petryshen T, Kirby, M. Ainscow. LocusView 2.0. Broad Institute.
